# Supplementary material for: Willingness to seek medical care for tuberculosis and associated factors among the elderly population in Shenzhen: a cross-sectional study
Source: PubMed Central journal article supplement — BMJ Open. 2021 Sep 20;11(9):e051291. doi: 10.1136/bmjopen-2021-051291 (PMC8458307; doi:10.1136/bmjopen-2021-051291), 2021-09-20
Supplement: bmjopen-2021-051291.draft_revisions.pdf [file bmjopen-2021-051291.draft_revisions.pdf]

# BMJ Open

BMJ Open is committed to open peer review. As part of this commitment we make the peer review history of every article we publish publicly available.

When an article is published we post the peer reviewers' comments and the authors' responses online. We also post the versions of the paper that were used during peer review. These are the versions that the peer review comments apply to.

The versions of the paper that follow are the versions that were submitted during the peer review process. They are not the versions of record or the final published versions. They should not be cited or distributed as the published version of this manuscript.

BMJ Open is an open access journal and the full, final, typeset and author-corrected version of record of the manuscript is available on our site with no access controls, subscription charges or pay-per-view fees (<http://bmjopen.bmj.com>).

If you have any questions on BMJ Open's open peer review process please email [info.bmjopen@bmj.com](mailto:info.bmjopen@bmj.com)

# BMJ Open

## Medical care-seeking willingness for tuberculosis and associated factors among elderly population in Shenzhen: a cross-sectional study

|                               |                                                                                                                                                                                                                                                                                                                                                                                                                                                                                         |
|-------------------------------|-----------------------------------------------------------------------------------------------------------------------------------------------------------------------------------------------------------------------------------------------------------------------------------------------------------------------------------------------------------------------------------------------------------------------------------------------------------------------------------------|
| Journal:                      | <i>BMJ Open</i>                                                                                                                                                                                                                                                                                                                                                                                                                                                                         |
| Manuscript ID                 | bmjopen-2021-051291                                                                                                                                                                                                                                                                                                                                                                                                                                                                     |
| Article Type:                 | Original research                                                                                                                                                                                                                                                                                                                                                                                                                                                                       |
| Date Submitted by the Author: | 17-Apr-2021                                                                                                                                                                                                                                                                                                                                                                                                                                                                             |
| Complete List of Authors:     | Wang, Yunxia; Chronic Disease Control of Shenzhen<br>Feng, Jing; Huazhong University of Science and Technology<br>Shen, Xin; Huazhong University of Science and Technology<br>Zhu, Yi; Huazhong University of Science and Technology<br>Meng, Xin; Huazhong University of Science and Technology<br>Di, Hongkun; Huazhong University of Science and Technology<br>Xia, Wenqi; Huazhong University of Science and Technology<br>Gan, Yong; Huazhong University of Science and Technology |
| Keywords:                     | Tuberculosis < INFECTIOUS DISEASES, Public health < INFECTIOUS DISEASES, Infection control < INFECTIOUS DISEASES                                                                                                                                                                                                                                                                                                                                                                        |
|                               |                                                                                                                                                                                                                                                                                                                                                                                                                                                                                         |

SCHOLARONE™  
Manuscripts

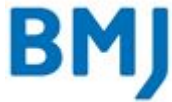

I, the Submitting Author has the right to grant and does grant on behalf of all authors of the Work (as defined in the below author licence), an exclusive licence and/or a non-exclusive licence for contributions from authors who are: i) UK Crown employees; ii) where BMJ has agreed a CC-BY licence shall apply, and/or iii) in accordance with the terms applicable for US Federal Government officers or employees acting as part of their official duties; on a worldwide, perpetual, irrevocable, royalty-free basis to BMJ Publishing Group Ltd ("BMJ") its licensees and where the relevant Journal is co-owned by BMJ to the co-owners of the Journal, to publish the Work in this journal and any other BMJ products and to exploit all rights, as set out in our [licence](#).

The Submitting Author accepts and understands that any supply made under these terms is made by BMJ to the Submitting Author unless you are acting as an employee on behalf of your employer or a postgraduate student of an affiliated institution which is paying any applicable article publishing charge ("APC") for Open Access articles. Where the Submitting Author wishes to make the Work available on an Open Access basis (and intends to pay the relevant APC), the terms of reuse of such Open Access shall be governed by a Creative Commons licence – details of these licences and which [Creative Commons](#) licence will apply to this Work are set out in our licence referred to above.

Other than as permitted in any relevant BMJ Author's Self Archiving Policies, I confirm this Work has not been accepted for publication elsewhere, is not being considered for publication elsewhere and does not duplicate material already published. I confirm all authors consent to publication of this Work and authorise the granting of this licence.

1  
2  
3  
4 **Medical care-seeking willingness for tuberculosis and associated factors among elderly**  
5  
6 **population in Shenzhen: a cross-sectional study**  
7  
8  
9

10 Yunxia Wang, PhD<sup>1†</sup>, Jing Feng, MPH<sup>2†</sup>, Xin Shen, MPH<sup>2</sup>, Yi Zhu, MS<sup>2</sup>, Xin Meng, MS<sup>2</sup>,  
11  
12 Hongkun Di, MS<sup>2</sup>, Wenqi Xia, MS<sup>2</sup>, Yong Gan, PhD<sup>2\*</sup>  
13  
14  
15  
16  
17  
18

19 **†These authors contributed equally to this work.**  
20  
21  
22  
23  
24

25 **Authors' affiliations:** <sup>1</sup>Shenzhen Bao'an Center for Chronic Disease Control, Shenzhen,  
26 Guangdong, China; <sup>2</sup>Department of Social Medicine and Health Management, School of  
27 Public Health, Tongji Medical College, Huazhong University of Science and Technology,  
28  
29 Wuhan, Hubei, China  
30  
31  
32  
33  
34  
35  
36  
37

38 **\*Correspondence to:** Dr. Yong Gan, Department of Social Medicine and Health  
39 Management, School of Public Health, Tongji Medical College, Huazhong University of  
40 Science and Technology, No. 13 Hangkong Road, Wuhan 430030, China; Telephone and fax  
41 numbers: +86-27-83692396; E-mail: scswj2008@163.com  
42  
43  
44  
45  
46  
47  
48  
49  
50  
51  
52  
53  
54  
55  
56  
57  
58  
59  
60

## Abstract

**Objectives** This study was aiming at assessing the willingness of elderly people to seek medical care for tuberculosis (TB) and its influencing factors.

**Design** A cross-sectional study.

**Setting** A multistage random survey was conducted in Bao'an District of Shenzhen in China.

**Participants** 1200 elderly people aged 65 years or above were recruited to the study and completed a structured questionnaire between September and October 2019.

**Main outcome measures** Descriptive and binary logistic stepwise regression was conducted to analyze the characteristics of elderlies, their willingness and associated factors to seek medical care for TB.

**Results** Among 1140 respondents, 989 (86.75%) were willing to seek medical care if they discover TB suspicious symptoms. Binary logistic stepwise regression analysis indicated that elderly people who were at higher education levels (junior or senior middle school: odds ratio [OR] 1.93, 95% confidence interval [CI] 1.19-3.13;  $P=0.008$ ; college degree or above: OR 3.64, 95% CI 0.84-15.80;  $P=0.085$ ), scored more than 3 points on TB knowledge (OR 3.61, 95% CI 2.21-5.87;  $P<0.001$ ), scored more than 2 points on TB (OR 1.93, 95% CI 1.23-3.04;  $P=0.004$ ), and scored more than 2 points on TB practice (OR 2.97, 95% CI 1.88-4.67;  $P<0.001$ ) were more willing to seek medical care for TB.

**Conclusions** Willingness to seek medical care for TB of elderly population needs to be further improved.

### Strengths and limitations of this study

- This is the first study to investigate the willingness to seek medical care for tuberculosis (TB) among the elderly in China.
- The logistic regression model provides a quantified result of the influencing factors of medical care-seeking willingness for TB among elderlies, which could provide reference for TB control policies.
- The potential influencing factors of medical care-seeking willingness for TB are possibly more than the ones we investigated in the study. In addition, the cross-sectional study design is limited to identify causality of the observed relationships.

## Introduction

Tuberculosis (TB) is a major cause of ill health, one of the top 10 causes of death worldwide and the leading cause of death from a single infectious agent. Globally, an estimated 10 million people fell ill with TB and 1.4 million died in 2019.<sup>1</sup> The risk of TB increases with age and the pace of population ageing is getting faster in modern China. It is estimated by the World Health Organization (WHO) that there will be 402 million people aged 60 years old or above in China by 2040.<sup>2</sup> The Fifth National TB Epidemiological Survey revealed that 48.8% of TB patients were over 60 years, while the prevalence of active TB in the elderly population over 65 years was determined at 1270/100,000.<sup>3</sup> According to the Chinese Center for Disease Control and Prevention, a total of 775,764 cases of TB were reported in the National Notifiable Disease Reporting System (NNDRS) in 2019.<sup>4</sup> The reporting rate of TB cases increased with age, with 197,730 (25.5%) cases among people aged 65 years or older.<sup>4</sup> That elderly people were one of the bottlenecks in TB control in China, and more TB preventive measures are needed to reach the most vulnerable populations at high priority.

Currently, the "Trinity" TB prevention and treatment model by China is comprised of the Center for Disease Control and Prevention, designated TB diagnostic and treatment hospitals, and primary healthcare institutions.<sup>5</sup> This model plays an important role in TB control and has made some progress. However, the rate of delay in TB diagnosis and treatment has remained high among the elderly,<sup>6-8</sup> which is a major contributor to worse outcomes and TB spreading. The medical care-seeking willingness of elderly people with suspicious symptoms could predict the actual behavior to seek care in TB prevention and treatment institutions. And positive behavior on TB could not only improve the detection rate for TB, but also reduce the proportion of delayed diagnosis and treatment.<sup>9</sup> In addition to the issues outlined above, this was the first study to examine the willingness to seek medical care for TB and its

1  
2  
3  
4 determinants among elderly people aged 65 years. The findings may provide references for  
5  
6 TB prevention and control among the elderly.  
7  
8  
9

## 10 11 **Methods**

### 12 13 14 **Study population and sampling**

15  
16 This study was conducted between September to October 2019 in Bao'an district of Shenzhen.  
17  
18 A multistage random sampling method was performed in the study. First, 2 of 8 community  
19  
20 health centers with chest X-ray film screening capabilities in Bao'an District were selected  
21  
22 randomly. Second, 600 people aged 65 years or above who received health examinations were  
23  
24 randomly selected from every community health service center. Initially, 1200 elderly people  
25  
26 were targeted at be recruited in the survey, of whom 11 (0.92%) refused to participate in the  
27  
28 study. Additionally, 49 questionnaires were discarded because of a lot of missing data and  
29  
30 logical error. Finally, 1140 eligible questionnaires remained for analysis.  
31  
32  
33  
34  
35  
36

### 37 **Patient and public involvement**

38  
39 No patient involved.  
40  
41  
42  
43

### 44 **Instrument and measurement**

45  
46 A cross-sectional study was used to collect data from the elderly population through face-to-  
47  
48 face interviews with a structured questionnaire. The questionnaire included four sections: (1)  
49  
50 demographic characteristics, such as gender, age, education level, marital status, and family  
51  
52 annual income per capita, (2) health-related characteristics, including self-perceived health  
53  
54 status, smoking and alcohol consumption habits, (3) knowledge, attitudes, and practice for TB  
55  
56 prevention and control, and (4) medical care-seeking willingness for TB and specific reasons  
57  
58  
59  
60



1  
2  
3  
4 for being unwilling to do so. Incorrect, inappropriate, or uncertain (did not know) responses  
5  
6 were given a 0 score, while 1 point was given for choosing the correct or appropriate answer;  
7  
8 a correct or appropriate response was based on current literature and best practice.  
9

### 10 11 12 13 **Data collection and quality control**

14  
15 The questionnaire was designed based on literature review, group discussions, and mock  
16  
17 interviews. A pilot study was conducted at one of the community health service centers in  
18  
19 Bao'an District of Shenzhen to improve the quality of the questionnaire. The data were  
20  
21 collected by trained investigators through field questionnaire survey. A logic check of all data  
22  
23 was undertaken to determine if there were any contradictions.  
24  
25  
26  
27  
28

### 29 **Statistical analysis**

30  
31 All statistical procedures were performed using the SPSS V.22.0 software. The descriptive  
32  
33 statistics were presented as the number of observations with percentage (%).  $\chi^2$  tests were  
34  
35 conducted to compare the willingness of the elderly to seek medical care for TB between  
36  
37 groups. A binary logistic stepwise regression model was used to analyze the factors associated  
38  
39 with the medical care-seeking willingness for TB of the elderly (level for selection and  
40  
41 elimination:  $P=0.05$  and  $P=0.10$ , respectively). In the binary model, independent variables  
42  
43 included all characteristics of the population. Odds ratio (OR) and 95% confidence interval  
44  
45 (CI) for each variable were calculated. All tests were two-sided with a significance level of  
46  
47  
48  
49  
50  
51  
52  
53  
54  
55  
56  
57  
58  
59  
60 0.05.

### 54 **Results**

57 The characteristics of participants are reported in Table 1. Among 1140 participants (response  
58  
59 rate, 95.88%), 520 (45.61%) were males and 588 (51.58%) were aged 65~70 years. More than  
60

1  
2  
3  
4 half (54.43%) of them were at primary school or below. The majority (78.57%) of  
5  
6 participants held non-Shenzhen household registrations, and 972 (89.34%) were married.  
7  
8 There were 409 (37.91%) respondents with family annual income per capita lower than  
9  
10 50,000 ¥. The 47.45% of elderly people reported to have a good self-perceived health status.  
11  
12 125 (10.97%) and 108 (9.47%) were current cigarette smokers or alcohol drinkers. The  
13  
14 majority (73.68% and 73.60%) of respondents knew the infectivity and suspicious symptoms  
15  
16 of TB. 981 (86.05%) elderly were willing to learn about TB knowledge. Only 343 (30.09%)  
17  
18 participants stopped other people's spitting behavior.  
19  
20

21  
22 A total of 989 (86.75%) elderly people over 65 years chose to seek medical care when they  
23  
24 exhibited TB suspicious symptoms, whereas 151 (13.25%) were unwilling to seek treatment.  
25  
26 Additionally, when we investigated the reasons for unwillingness, 80 (33.9%) considered  
27  
28 "long treatment cycle and heavy financial burden" as the main reason (Table 2).  
29  
30

31  
32 Table 3 demonstrates results comparing the differences in willingness to seek medical care  
33  
34 for TB among various groups. There were significant differences in the willingness of the  
35  
36 elderly to seek medical care for TB across age groups, education levels, and scores for TB  
37  
38 core knowledge, beliefs and related behaviors ( $P<0.05$ ).  
39  
40

41  
42 Table 4 shows results from the binary logistic regression analysis to determine factors  
43  
44 associated with the medical care-seeking willingness for TB among the elderly. In  
45  
46 comparison with those who were only primary school or below educated, those with higher  
47  
48 education levels were more willing to seek care for TB (junior or senior middle school: OR  
49  
50 1.93, 95% CI 1.19-3.13;  $P=0.008$ ; college degree or above: OR 3.64, 95% CI 0.84-15.80;  
51  
52  $P=0.085$ ). The higher their scores on TB-related core knowledge, beliefs and behaviors, the  
53  
54 greater their willingness to seek medical care for TB (TB knowledge scores $\geq$ 3: OR 3.61, 95%  
55  
56 CI 2.21-5.87;  $P<0.001$ ; TB attitudes scores $\geq$ 2: OR 1.93, 95% CI 1.23-3.04;  $P=0.004$ ; TB  
57  
58 practice scores $\geq$ 2: OR 2.97, 95% CI 1.88-4.67,  $P<0.001$ ).  
59  
60

## Discussion

This was the first study to investigate the willingness of the elderly to seek care for TB in China. We found that 86.75% of participants were willing to seek care for TB, while 13.25% were unwilling to do so. Individuals with suspicious symptoms of TB who do not seek medical care for TB will miss the opportunity for early detection of TB, which leads to delayed treatment and poor prognosis. In addition, unwillingness to seek medical care may increase the potential risk of transmission and will have a negative impact on their families and the society.

The findings showed that the main reasons for being unwilling to seek care for TB were "long treatment cycle and heavy economic burden". This indicated that individual's economic situation impacts their willingness to seek treatment, which needed to raise the attention to promote the publicity of free TB examination and treatment policy from those TB policy makers. This point was further supported by the multivariate analysis result that TB-related core knowledge affected the willingness of the elderly to seek treatment.

Many participants also were worried about being discriminated for visiting TB prevention and treatment institutions, which was also an important factor hindering their willingness to seek treatment. Previous studies have shown that TB patients suffered from widespread discriminatory and differential treatment due to the long-term stereotypes about TB.<sup>10-11</sup> The fear of being discriminated can affect the elderly's medical care-seeking willingness, health-seeking behaviors, and compliance during the treatment process. In order to increase the willingness of elderly population to seek medical care and enable them to receive timely treatment, it is crucial to further popularize knowledge about TB, eliminate denigration and stigmatization of TB through a variety of effective educational methods.

1  
2  
3  
4 The results of the multivariate analysis showed that higher scores on knowledge, attitudes,  
5 and behaviors related to TB prevention and control were associated with greater willingness  
6 to seek medical care for TB. However, the overall awareness rate for TB core knowledge was  
7 not high, with 60.48% of elderly persons scored more than 3 points. While the majority of  
8 participants could correctly recognize that TB is a serious infectious disease and knew the  
9 suspicious symptoms of TB, they were unaware of the principles of TB consultation, national  
10 policy, and disease outcomes. These results were consistent with a study conducted by Wu,<sup>12</sup>  
11 which indicated that it is necessary to strengthen the publicity and education of TB-related  
12 knowledge among the elderly.  
13  
14  
15  
16  
17  
18  
19  
20  
21  
22  
23

24 This study showed that elderlies with higher education levels were more willing to seek  
25 medical care for TB. The majority of participants were at primary school level or below.  
26 Currently, health education related to TB is mostly conducted through traditional means (e.g.,  
27 distributing pamphlets in communities) or new media (e.g., WeChat). This is not very  
28 effective for the elderly due to low levels of access and understanding among those with low  
29 education levels. It is thus important to ensure that elderly people can easily access  
30 educational materials and the content should be easily to understand.  
31  
32  
33  
34  
35  
36  
37  
38  
39

40 There are several strengths in this study. First, this was the first study to investigate the  
41 willingness of the elderly to seek medical care for TB in China. Second, our research found  
42 some important factors were associated with the medical care-seeking willingness, which  
43 could provide reference for TB control policies among elderly people. However, some  
44 limitations should be noted that the potential influencing factors of medical care-seeking  
45 willingness are possibly more than the ones we investigated in the study. Second, this was a  
46 cross-sectional study, which limited to identify causality of the observed relationships. Third,  
47 this study enrolled only elderly people in Shenzhen, limiting the generalisability of finding to  
48 other geographical regions.  
49  
50  
51  
52  
53  
54  
55  
56  
57  
58  
59  
60

## Conclusion

In summary, this study found that education levels and TB-related knowledge, attitudes, and practice were significant predictors of medical care-seeking willingness for TB among elderlies. It is necessary to promote the publicity of TB-related knowledge and policies among the elderly. Measures must also be taken to clarify social misconceptions about TB and eliminate discrimination against TB patients.

## Declarations

### Acknowledgements

We thank the elderly population who participated in this research.

### Contributors

YXW, JF, and YG conceived and designed the study. JF, XS, YZ, XM, HKD, and WQX participated in the acquisition of data. YXW and XS analyzed the data. YG gave advice on methodology. YXW and JF wrote the draft of the paper. All authors contributed to writing, reviewing or revising the paper and read and approved the final manuscript. YG is the guarantors of this work and has full access to all the data in the study and takes responsibility for its integrity and the accuracy of the data analysis.

### Funding

This work was supported by National Science and Technology Major Project of the Ministry of Science and Technology of China (2018ZX10715004).

**Competing interests**

We declare that we have no conflict of interests.

**Patient consent for publication**

Not required.

**Ethics approval**

The study was approved by the Ethics Committee of the Tongji Medical College Institutional Review Board, Huazhong University of Science and Technology, Wuhan, China (no. [2021] IEC (S081)).

**Data sharing statement**

Data may be made available by contacting the corresponding author.

**Word count**

2131 words

## References

1. World Health Organization. Global tuberculosis report 2020. Geneva, 2020.
2. World Health Organization. China country assessment report on ageing and health. Geneva, 2015.
3. Wang Y. Data compilation of the fifth national tuberculosis epidemiological sampling survey in China. *Beijing: Military Medical Science Press* 2011:3.
4. Chen W, Zhang H, Du X, Li T, Zhao Y. Characteristics and Morbidity of the Tuberculosis Epidemic — China, 2019. *China CDC Weekly* 2020;2(12): 181-184.
5. General Office of the State Council, PRC. National Tuberculosis Prevention and Control Plan (2011-2015). Available from: [http://www.gov.cn/gongbao/content/2011/content\\_2020914.htm](http://www.gov.cn/gongbao/content/2011/content_2020914.htm). Accessed 15 Dec 2020.
6. Li Y, Wang Z, Geng H. Current status and influencing factors of delayed visits to elderly pulmonary tuberculosis patients in Shandong Province. *Chinese Journal of Gerontology* 2013;33(5):1125-1127.
7. Yang J, Du Y, Zhao Y, Zhang S. Patient delay and the impact factors for senile pulmonary tuberculosis in rural area. *Chinese Rural Health Service Administration* 2010;30(4):300-302.
8. Shen H, Du Y, Zhang G, Wu G, Liu J, Li T. Influencing factors of pulmonary tuberculosis patient delay in Guangzhou, 2008-2018. *Chinese Journal of Antituberculosis* 2020;42(5):510-517.
9. Tang C, Tian K, Wang Y. Characteristic and impact factors of health-seeking delay of the suspects with pulmonary tuberculosis in Chongqing. *Chinese Journal of Antituberculosis* 2007;29(1):66-69.
10. Cramm JM, Finkenflügel HJ, Møller V, Nieboer AP. TB treatment initiation and adherence in a South African community influenced more by perceptions than by knowledge of tuberculosis. *BMC Public Health* 2010;10:72.
11. Mushtaq MU, Majrooh MA, Ahmad W, Rizwan M, Luqman MQ, Aslam MJ, Siddiqui AM, Akram J, Shad MA. Knowledge, attitudes and practices regarding tuberculosis in two districts of Punjab, Pakistan. *Int J Tuberc Lung Dis* 2010;14(3):303-10.
12. Wu Y, Liu B, Gong D, Chen L, Feng D, Wu R. Investigation and analysis on the knowledge of tuberculosis prevention and control among elderly close contacts of tuberculosis patients. *Chinese Journal of Antituberculosis* 2020;42(7):701-706.

**Table 1 Characteristics of the study population**

| <b>Variables</b>                                                            | <b>N</b> | <b>%</b> |
|-----------------------------------------------------------------------------|----------|----------|
| <b>Total</b>                                                                | 1140     | 100      |
| <b>Age, y</b>                                                               |          |          |
| 65~70                                                                       | 588      | 51.58    |
| 71~75                                                                       | 325      | 28.51    |
| >75                                                                         | 227      | 19.91    |
| <b>Gender</b>                                                               |          |          |
| Male                                                                        | 520      | 45.61    |
| Female                                                                      | 620      | 54.39    |
| <b>Residence</b>                                                            |          |          |
| Local residents                                                             | 239      | 21.43    |
| Others                                                                      | 876      | 78.57    |
| <b>Education</b>                                                            |          |          |
| Primary school or below                                                     | 608      | 54.43    |
| Junior or senior middle school                                              | 438      | 39.21    |
| Bachelor degree or above                                                    | 71       | 6.36     |
| <b>Marital status</b>                                                       |          |          |
| Unmarried/widow/divorced                                                    | 116      | 10.66    |
| Married                                                                     | 972      | 89.34    |
| <b>Family annual income per capita (¥)</b>                                  |          |          |
| <50,000                                                                     | 409      | 37.91    |
| 50,000~100,000                                                              | 353      | 32.72    |
| 100,000~200,000                                                             | 221      | 20.48    |
| >200,000                                                                    | 96       | 8.90     |
| <b>Self-perceived health status</b>                                         |          |          |
| Good                                                                        | 512      | 47.45    |
| Fair                                                                        | 493      | 45.69    |
| Bad                                                                         | 74       | 6.86     |
| <b>Smoking status</b>                                                       |          |          |
| Current smoker                                                              | 125      | 10.97    |
| Former smoker                                                               | 96       | 8.43     |
| Never smoker                                                                | 918      | 80.60    |
| <b>Alcohol intake</b>                                                       |          |          |
| Current drinker                                                             | 108      | 9.47     |
| Former drinker                                                              | 84       | 7.37     |
| Never drinker                                                               | 948      | 83.16    |
| <b>Core knowledge of TB</b>                                                 |          |          |
| TB is a serious infectious disease.                                         | 840      | 73.68    |
| TB should be suspected if cough or expectoration more than 2 weeks.         | 839      | 73.60    |
| TB should be examined and treated in designated institutions.               | 409      | 35.88    |
| TB examination and treatment can be free in the designated institution.     | 624      | 54.73    |
| TB is a curable disease.                                                    | 294      | 25.79    |
| <b>Attitude towards TB</b>                                                  |          |          |
| TB is a terrible disease.                                                   | 684      | 60.00    |
| Willing to learn about TB knowledge.                                        | 981      | 86.05    |
| Willing to attend community activities for TB control.                      | 379      | 33.24    |
| Willing to offer TB knowledge to others.                                    | 358      | 31.40    |
| <b>TB-related practice</b>                                                  |          |          |
| Going to a doctor if catching cough or expectoration for more than 2 weeks. | 956      | 83.86    |



1  
2  
3  
4  
5  
6  
7  
8  
9  
10  
11  
12  
13  
14  
15  
16  
17  
18  
19  
20  
21  
22  
23  
24  
25  
26  
27  
28  
29  
30  
31  
32  
33  
34  
35  
36  
37  
38  
39  
40  
41  
42  
43  
44  
45  
46  
47  
48  
49  
50  
51  
52  
53  
54  
55  
56  
57  
58  
59  
60

|                                                                              |     |       |
|------------------------------------------------------------------------------|-----|-------|
| Seeking medical attention immediately if suspect that yourself suffering TB. | 974 | 85.44 |
| Stop other people's spitting behavior.                                       | 343 | 30.09 |

---

For peer review only

**Table 2 Distribution according to the reasons of unwillingness to seek medical care for TB among elderly population**

| Items                                                                          | N  | %     |
|--------------------------------------------------------------------------------|----|-------|
| Lack of trust in the medical level of TB prevention and treatment institutions | 44 | 18.60 |
| Poor attitude of medical staff                                                 | 8  | 3.40  |
| Long treatment time and heavy economic burden                                  | 80 | 33.90 |
| Fear of discrimination                                                         | 44 | 18.60 |
| Others                                                                         | 60 | 25.40 |

For peer review only

**Table 3 Factors associated with medical care-seeking willingness for tuberculosis among elderly population**

| Variables                           | Number in unwillingness (%) | Number in willingness (%) | $\chi^2$ | P value |
|-------------------------------------|-----------------------------|---------------------------|----------|---------|
| Age, y                              |                             |                           | 7.01     | 0.03    |
| 65~70                               | 79 (53.0)                   | 509 (51.4)                |          |         |
| 71~75                               | 31 (20.8)                   | 294 (29.7)                |          |         |
| >75                                 | 39 (26.2)                   | 188 (19.0)                |          |         |
| Gender                              |                             |                           | 3.00     | 0.08    |
| Male                                | 59 (39.1)                   | 461 (46.6)                |          |         |
| Female                              | 92 (60.9)                   | 528 (53.4)                |          |         |
| Residence                           |                             |                           | 0.01     | 0.91    |
| Local residents                     | 31 (21.1)                   | 208 (21.5)                |          |         |
| Others                              | 116 (78.9)                  | 760 (78.5)                |          |         |
| Education                           |                             |                           | 15.80    | <0.001  |
| Primary school or below             | 103 (69.1)                  | 505 (52.2)                |          |         |
| Junior or Senior middle school      | 42 (28.2)                   | 396 (40.9)                |          |         |
| College degree or above             | 4 (2.7)                     | 67 (6.9)                  |          |         |
| Marital status                      |                             |                           | 0.25     | 0.61    |
| Unmarried/widow/divorced            | 18 (11.8)                   | 98 (10.5)                 |          |         |
| Married                             | 134 (88.2)                  | 838 (89.5)                |          |         |
| Family annual income per capita (¥) |                             |                           | 9.11     | 0.06    |
| <50,000                             | 67 (47.5)                   | 342 (36.5)                |          |         |
| 50,000~100,000                      | 36 (25.5)                   | 317 (33.8)                |          |         |
| 100,000~200,000                     | 29 (20.6)                   | 192 (20.5)                |          |         |
| >200,000                            | 9 (6.4)                     | 87 (9.3)                  |          |         |
| Self-perceived health status        |                             |                           | 2.35     | 0.31    |
| Good                                | 58 (41.4)                   | 454 (48.3)                |          |         |
| Fair                                | 71 (50.7)                   | 422 (44.9)                |          |         |
| Bad                                 | 11 (7.9)                    | 63 (6.7)                  |          |         |
| Smoking status                      |                             |                           | 2.69     | 0.26    |
| Current Smoker                      | 13 (8.8)                    | 112 (11.3)                |          |         |
| Former smoker                       | 17 (11.6)                   | 79 (8.0)                  |          |         |
| Never smoker                        | 117 (79.6)                  | 801 (80.7)                |          |         |
| Alcohol intake                      |                             |                           | 3.06     | 0.22    |
| Current Drinker                     | 10 (6.7)                    | 98 (9.9)                  |          |         |
| Former drinker                      | 15 (10.0)                   | 69 (7.0)                  |          |         |
| Never drinker                       | 124 (83.3)                  | 824 (83.1)                |          |         |
| TB knowledge scores                 |                             |                           | 74.04    | <0.001  |
| $\geq 3$                            | 41 (28.1)                   | 617 (65.5)                |          |         |
| <3                                  | 105 (71.9)                  | 325 (34.5)                |          |         |
| TB attitudes scores                 |                             |                           | 11.00    | 0.001   |
| $\geq 2$                            | 134 (89.9)                  | 761 (78.2)                |          |         |
| <2                                  | 15 (10.1)                   | 212 (21.8)                |          |         |
| TB practice scores                  |                             |                           | 61.36    | <0.001  |
| $\geq 2$                            | 78 (56.1)                   | 724 (84.5)                |          |         |
| <2                                  | 61 (43.9)                   | 133 (15.5)                |          |         |

**Table 4 Binary logistic regression analysis for the association with medical care-seeking willingness for tuberculosis among elderly population**

| Variables(reference)                      | <i>B</i> | <i>SE</i> | Wald $\chi^2$ | <i>P</i> value | OR (95%CI)        |
|-------------------------------------------|----------|-----------|---------------|----------------|-------------------|
| Education level (Primary school or below) |          |           |               |                |                   |
| Junior or Senior middle school            | 0.657    | 0.246     | 7.144         | 0.008          | 1.93 (1.19-3.13)  |
| College degree or above                   | 1.291    | 0.750     | 2.965         | 0.085          | 3.64 (0.84-15.80) |
| TB knowledge scores (<3)                  |          |           |               |                |                   |
| $\geq 3$                                  | 1.282    | 0.249     | 26.571        | <0.001         | 3.61 (2.21-5.87)  |
| TB attitudes scores (<2)                  |          |           |               |                |                   |
| $\geq 2$                                  | 0.659    | 0.231     | 8.112         | 0.004          | 1.93 (1.23-3.04)  |
| TB practice scores (<2)                   |          |           |               |                |                   |
| $\geq 2$                                  | 1.087    | 0.232     | 21.934        | <0.001         | 2.97 (1.88-4.67)  |

**STROBE 2007 (v4) Statement—Checklist of items that should be included in reports of *cross-sectional studies***

| Section/Topic                | Item # | Recommendation                                                                                                                                                                       | Reported on page # |
|------------------------------|--------|--------------------------------------------------------------------------------------------------------------------------------------------------------------------------------------|--------------------|
| Title and abstract           | 1      | (a) Indicate the study's design with a commonly used term in the title or the abstract                                                                                               | 1, 2               |
|                              |        | (b) Provide in the abstract an informative and balanced summary of what was done and what was found                                                                                  | 2                  |
| <b>Introduction</b>          |        |                                                                                                                                                                                      |                    |
| Background/rationale         | 2      | Explain the scientific background and rationale for the investigation being reported                                                                                                 | 4, 5               |
| Objectives                   | 3      | State specific objectives, including any prespecified hypotheses                                                                                                                     | 4, 5               |
| <b>Methods</b>               |        |                                                                                                                                                                                      |                    |
| Study design                 | 4      | Present key elements of study design early in the paper                                                                                                                              | 5                  |
| Setting                      | 5      | Describe the setting, locations, and relevant dates, including periods of recruitment, exposure, follow-up, and data collection                                                      | 5                  |
| Participants                 | 6      | (a) Give the eligibility criteria, and the sources and methods of selection of participants                                                                                          | 5                  |
| Variables                    | 7      | Clearly define all outcomes, exposures, predictors, potential confounders, and effect modifiers. Give diagnostic criteria, if applicable                                             | 5                  |
| Data sources/<br>measurement | 8*     | For each variable of interest, give sources of data and details of methods of assessment (measurement). Describe comparability of assessment methods if there is more than one group | 5                  |
| Bias                         | 9      | Describe any efforts to address potential sources of bias                                                                                                                            | 6                  |

|                        |     |                                                                                                                                                                                                              |      |
|------------------------|-----|--------------------------------------------------------------------------------------------------------------------------------------------------------------------------------------------------------------|------|
| Study size             | 10  | Explain how the study size was arrived at                                                                                                                                                                    | 5    |
| Quantitative variables | 11  | Explain how quantitative variables were handled in the analyses. If applicable, describe which groupings were chosen and why                                                                                 | 6    |
| Statistical methods    | 12  | (a) Describe all statistical methods, including those used to control for confounding                                                                                                                        | 6    |
|                        |     | (b) Describe any methods used to examine subgroups and interactions                                                                                                                                          | 6    |
|                        |     | (c) Explain how missing data were addressed                                                                                                                                                                  | N/A  |
|                        |     | (d) If applicable, describe analytical methods taking account of sampling strategy                                                                                                                           | N/A  |
|                        |     | (e) Describe any sensitivity analyses                                                                                                                                                                        | N/A  |
| <b>Results</b>         |     |                                                                                                                                                                                                              |      |
| Participants           | 13* | (a) Report numbers of individuals at each stage of study—eg numbers potentially eligible, examined for eligibility, confirmed eligible, included in the study, completing follow-up, and analysed            | 6    |
|                        |     | (b) Give reasons for non-participation at each stage                                                                                                                                                         | N/A  |
|                        |     | (c) Consider use of a flow diagram                                                                                                                                                                           | N/A  |
| Descriptive data       | 14* | (a) Give characteristics of study participants (eg demographic, clinical, social) and information on exposures and potential confounders                                                                     | 6, 7 |
|                        |     | (b) Indicate number of participants with missing data for each variable of interest                                                                                                                          | N/A  |
| Outcome data           | 15* | Report numbers of outcome events or summary measures                                                                                                                                                         | 7    |
| Main results           | 16  | (a) Give unadjusted estimates and, if applicable, confounder-adjusted estimates and their precision (eg, 95% confidence interval). Make clear which confounders were adjusted for and why they were included | 7    |
|                        |     | (b) Report category boundaries when continuous variables were categorized                                                                                                                                    | 7    |

|                          |    |                                                                                                                                                                            |      |
|--------------------------|----|----------------------------------------------------------------------------------------------------------------------------------------------------------------------------|------|
|                          |    | (c) If relevant, consider translating estimates of relative risk into absolute risk for a meaningful time period                                                           | N/A  |
| Other analyses           | 17 | Report other analyses done—eg analyses of subgroups and interactions, and sensitivity analyses                                                                             | N/A  |
| <b>Discussion</b>        |    |                                                                                                                                                                            |      |
| Key results              | 18 | Summarise key results with reference to study objectives                                                                                                                   | 8, 9 |
| Limitations              | 19 | Discuss limitations of the study, taking into account sources of potential bias or imprecision. Discuss both direction and magnitude of any potential bias                 | 9    |
| Interpretation           | 20 | Give a cautious overall interpretation of results considering objectives, limitations, multiplicity of analyses, results from similar studies, and other relevant evidence | 8, 9 |
| Generalisability         | 21 | Discuss the generalisability (external validity) of the study results                                                                                                      | 9    |
| <b>Other information</b> |    |                                                                                                                                                                            |      |
| Funding                  | 22 | Give the source of funding and the role of the funders for the present study and, if applicable, for the original study on which the present article is based              | 10   |

\*Give information separately for cases and controls in case-control studies and, if applicable, for exposed and unexposed groups in cohort and cross-sectional studies.

**Note:** An Explanation and Elaboration article discusses each checklist item and gives methodological background and published examples of transparent reporting. The STROBE checklist is best used in conjunction with this article (freely available on the Web sites of PLoS Medicine at <http://www.plosmedicine.org/>, Annals of Internal Medicine at <http://www.annals.org/>, and Epidemiology at <http://www.epidem.com/>). Information on the STROBE Initiative is available at [www.strobe-statement.org](http://www.strobe-statement.org).

# BMJ Open

## Medical care-seeking willingness for tuberculosis and associated factors among elderly population in Shenzhen: a cross-sectional study

|                                 |                                                                                                                                                                                                                                                                                                                                                                                                                                                                                                                                                                                                                                                                                                                                                                |
|---------------------------------|----------------------------------------------------------------------------------------------------------------------------------------------------------------------------------------------------------------------------------------------------------------------------------------------------------------------------------------------------------------------------------------------------------------------------------------------------------------------------------------------------------------------------------------------------------------------------------------------------------------------------------------------------------------------------------------------------------------------------------------------------------------|
| Journal:                        | <i>BMJ Open</i>                                                                                                                                                                                                                                                                                                                                                                                                                                                                                                                                                                                                                                                                                                                                                |
| Manuscript ID                   | bmjopen-2021-051291.R1                                                                                                                                                                                                                                                                                                                                                                                                                                                                                                                                                                                                                                                                                                                                         |
| Article Type:                   | Original research                                                                                                                                                                                                                                                                                                                                                                                                                                                                                                                                                                                                                                                                                                                                              |
| Date Submitted by the Author:   | 29-Jul-2021                                                                                                                                                                                                                                                                                                                                                                                                                                                                                                                                                                                                                                                                                                                                                    |
| Complete List of Authors:       | Wang, Yunxia; Chronic Disease Control of Shenzhen<br>Feng, Jing; Huazhong University of Science and Technology<br>Shen, Xin; Huazhong University of Science and Technology<br>Lei, Zihui; Huazhong University of Science and Technology Tongji Medical College<br>Zhu, Yi; Huazhong University of Science and Technology<br>Meng, Xin; Huazhong University of Science and Technology<br>Di, Hongkun; Huazhong University of Science and Technology<br>Xia, Wenqi; Huazhong University of Science and Technology<br>Lu, Zuxun; Huazhong University of Science and Technology Tongji Medical College, Department of Social Medicine and Health Management<br>Wang, Xiaojun; Wuhan Pulmonary Hospital<br>Gan, Yong; Huazhong University of Science and Technology |
| <b>Primary Subject Heading</b>: | Infectious diseases                                                                                                                                                                                                                                                                                                                                                                                                                                                                                                                                                                                                                                                                                                                                            |
| Secondary Subject Heading:      | Public health                                                                                                                                                                                                                                                                                                                                                                                                                                                                                                                                                                                                                                                                                                                                                  |
| Keywords:                       | Tuberculosis < INFECTIOUS DISEASES, Public health < INFECTIOUS DISEASES, Infection control < INFECTIOUS DISEASES                                                                                                                                                                                                                                                                                                                                                                                                                                                                                                                                                                                                                                               |
|                                 |                                                                                                                                                                                                                                                                                                                                                                                                                                                                                                                                                                                                                                                                                                                                                                |

SCHOLARONE™  
Manuscripts





I, the Submitting Author has the right to grant and does grant on behalf of all authors of the Work (as defined in the below author licence), an exclusive licence and/or a non-exclusive licence for contributions from authors who are: i) UK Crown employees; ii) where BMJ has agreed a CC-BY licence shall apply, and/or iii) in accordance with the terms applicable for US Federal Government officers or employees acting as part of their official duties; on a worldwide, perpetual, irrevocable, royalty-free basis to BMJ Publishing Group Ltd ("BMJ") its licensees and where the relevant Journal is co-owned by BMJ to the co-owners of the Journal, to publish the Work in this journal and any other BMJ products and to exploit all rights, as set out in our [licence](#).

The Submitting Author accepts and understands that any supply made under these terms is made by BMJ to the Submitting Author unless you are acting as an employee on behalf of your employer or a postgraduate student of an affiliated institution which is paying any applicable article publishing charge ("APC") for Open Access articles. Where the Submitting Author wishes to make the Work available on an Open Access basis (and intends to pay the relevant APC), the terms of reuse of such Open Access shall be governed by a Creative Commons licence – details of these licences and which [Creative Commons](#) licence will apply to this Work are set out in our licence referred to above.

Other than as permitted in any relevant BMJ Author's Self Archiving Policies, I confirm this Work has not been accepted for publication elsewhere, is not being considered for publication elsewhere and does not duplicate material already published. I confirm all authors consent to publication of this Work and authorise the granting of this licence.

1  
2  
3  
4 **Medical care-seeking willingness for tuberculosis and associated factors among elderly**  
5 **population in Shenzhen: a cross-sectional study**  
6  
7  
8  
9

10  
11 Yunxia Wang, PhD<sup>1†</sup>, Jing Feng, MPH<sup>2†</sup>, Xin Shen, MPH<sup>2</sup>, Zihui Lei, MPH<sup>2</sup>, Yi Zhu, MS<sup>2</sup>,  
12  
13 Xin Meng, MS<sup>2</sup>, Hongkun Di, MS<sup>2</sup>, Wenqi Xia, MS<sup>2</sup>, Zuxun Lu, PhD<sup>2</sup>, Xiaojun Wang, PhD<sup>3\*</sup>,  
14  
15 Yong Gan, PhD<sup>2\*</sup>  
16  
17  
18  
19  
20

21 **†These authors contributed equally to this work.**  
22  
23  
24

25 **Authors' affiliations:** <sup>1</sup>Shenzhen Bao'an Centre for Chronic Disease Control, Shenzhen,  
26  
27 Guangdong, China; <sup>2</sup>Department of Social Medicine and Health Management, School of  
28  
29 Public Health, Tongji Medical College, Huazhong University of Science and Technology,  
30  
31 Wuhan, Hubei, China; <sup>3</sup>Wuhan Institute for Tuberculosis Control, Wuhan Pulmonary  
32  
33 Hospital, Wuhan, Hubei, China  
34  
35  
36  
37  
38

39 **\*Correspondence to:** Dr. Yong Gan, Department of Social Medicine and Health  
40  
41 Management, School of Public Health, Tongji Medical College, Huazhong University of  
42  
43 Science and Technology, No. 13 Hangkong Road, Wuhan 430030, China; Telephone and fax  
44  
45 numbers: +86-27-83692396; E-mail: scswj2008@163.com or Dr. Xiaojun Wang, Wuhan  
46  
47 Institute for Tuberculosis Control, Wuhan Pulmonary Hospital, No. 28 Baofeng Road, Wuhan  
48  
49 430030, China; Telephone and fax numbers: +86-27-83602313; E-mail:  
50  
51 wangxiaojun\_cn@163.com  
52  
53  
54  
55  
56  
57  
58  
59  
60

## Abstract

**Objectives** This study was aiming at assessing the willingness of elderly people to seek medical care for tuberculosis (TB) and its influencing factors.

**Design** A cross-sectional study.

**Setting** A multistage random survey was conducted in Bao'an District of Shenzhen in China.

**Participants** 1,200 elderly people aged 65 years or above were recruited to the study and completed a structured questionnaire between September and October 2019.

**Main outcome measures** Descriptive and binary logistic stepwise regression analyses were conducted to analyze the characteristics of elderlies, their willingness and associated factors to seek medical care for TB.

**Results** Among 1,123 respondents, 943 (84.0%) were willing to seek medical care if they discover TB suspicious symptoms. Binary logistic stepwise regression analysis indicated that elderly people whose family annual income per capita was 50,000–100,000 ¥ [odds ratio (OR) = 2.56, 95% confidence interval (CI): 1.44–4.54], who had positive attitudes ( $\geq 3$  scores: OR = 3.10, 95% CI: 1.90–5.05) or practices ( $\geq 4$  scores: OR = 3.13, 95% CI: 1.82–5.39) towards TB were more willing to seek medical care for TB.

**Conclusions** Willingness to seek medical care for TB of the elderly population can be further improved according to the determinants.

### Strengths and limitations of this study

- This is the first study to investigate the willingness to seek medical care for tuberculosis (TB) among the elderly in China.
- The logistic regression model provides a quantified result of the influencing factors of medical care-seeking willingness for TB among elderlies, which could provide reference for TB control policies.
- The potential influencing factors of medical care-seeking willingness for TB are possibly more than the ones we investigated in the study.
- The cross-sectional study design is limited to identify causality of the observed relationships.

## Introduction

Tuberculosis (TB) is a major cause of ill health, one of the top 10 causes of death worldwide, and the leading cause of death from a single infectious agent. Globally, an estimated 10 million people fell ill with TB and 1.4 million died in 2019.<sup>1</sup> The risk of TB increases with age and the pace of population ageing is getting faster in modern China. It is estimated by the World Health Organization (WHO) that there will be 402 million people aged 60 years old or above in China by 2040.<sup>2</sup> The Fifth National TB Epidemiological Survey revealed that 48.8% of TB patients were over 60 years, while the prevalence of active TB in the elderly population over 65 years was determined at 1,270/100,000.<sup>3</sup> According to the Chinese Centre for Disease Control and Prevention, a total of 775,764 cases of TB were reported in the National Notifiable Disease Reporting System (NNDRS) in 2019.<sup>4</sup> The reporting rate of TB cases increased with age, with 197,730 (25.5%) cases among people aged 65 years or older.<sup>4</sup> That elderly people were one of the bottlenecks in TB control in China, and more TB preventive measures are needed to reach the most vulnerable populations at high priority.

Currently, the "Trinity" TB prevention and treatment model by China is comprised of the Centre for Disease Control and Prevention, designated TB diagnostic and treatment hospitals, and primary healthcare institutions.<sup>5</sup> This model plays an important role in TB control and has made some progress. However, the rate of delay in TB diagnosis and treatment has remained high among the elderly,<sup>6-8</sup> which is a major contributor to worse outcomes and TB transmission. The medical care-seeking willingness of elderly people with suspicious symptoms could predict the actual behaviour to seek care in TB prevention and treatment institutions. In addition, positive behaviour on TB could not only improve the detection rate for TB, but also reduce the proportion of delayed diagnosis and treatment.<sup>9</sup> Therefore, this study was aimed to examine the willingness to seek medical care for TB and its determinants

1  
2  
3  
4 among elderly people aged 65 years. The findings may provide references for TB prevention  
5  
6 and control among the elderly.  
7  
8  
9

## 10 **Methods**

### 11 **Study setting**

12  
13 Shenzhen, a highly developed region in China, had an estimated population of more than 13.4  
14  
15 million in 2019.<sup>10</sup> The percentage of the migrant population is 63.2% in Shenzhen, whereas  
16  
17 this rate was 80.5% in Bao'an district.<sup>10</sup> The immigrants were mostly poor, had a low level of  
18  
19 education, and lived in a circumstance conducive to TB transmission.<sup>11,12</sup> Although the  
20  
21 incidence of TB has declined in Shenzhen, the prevalence of TB remained high in Bao'an  
22  
23 district due to a high TB case load caused by a heavy concentration of migrants.  
24  
25  
26  
27  
28

29 The Chinese government has followed and launched the directly observed treatment +  
30  
31 short course chemotherapy (DOTS) strategy to control the epidemic of TB since 1990.<sup>13</sup>  
32  
33 Shenzhen was one of the first cities in China to implement the DOTS strategy in 1993 and its  
34  
35 coverage at the individual level has been reached 100% in 2000.<sup>14</sup> As the first established  
36  
37 special economic zone in China, the economy and society progress of Shenzhen developed  
38  
39 rapidly. There were robust health care infrastructure, providers, service culture, and  
40  
41 conditions for timely diagnosis and treatment.<sup>9,12</sup> The Centre for Chronic Disease Control, the  
42  
43 local TB designated institution, has provided TB diagnosis, treatment, and management.  
44  
45 Patients had free access to anti-TB fix-dose combination products and must undergo standard  
46  
47 anti-TB treatment.<sup>15</sup> Since patients started to take anti-TB drugs, they were required to visit  
48  
49 the Centre for Chronic Disease Control every month for health checks until the treatment  
50  
51 ends.<sup>11</sup> Besides the free TB drugs, the government has provided subsidies of transportation  
52  
53 and nutrition for low-income TB patients.<sup>16</sup> However, all patients had to pay for monthly  
54  
55  
56  
57  
58  
59  
60

1  
2  
3  
4 prescriptions of subsidiary drugs such as liver protection drugs and auxiliary examinations  
5  
6 like X-ray tests.<sup>11,17</sup>  
7  
8  
9

### 10 **Study population and sampling**

11  
12 This study was conducted between September and October 2019 in Bao'an district of  
13  
14 Shenzhen. Taking a confidence interval (CI) of 95%, an estimated proportion of 92.2%,<sup>18</sup> and  
15  
16 an absolute error of 5%, the sample size was rounded off to 113 according to the formula,  $n =$   
17  
18  $[Z^2p(1-p)]/d^2$ . To compensate for nonresponses, the sample size was increased by 10% to  
19  
20  
21  
22 124.

23  
24 A multistage random sampling method was performed in the study. First, 2 of 8  
25  
26 community health service centres with chest X-ray film screening capabilities in Bao'an  
27  
28 District were selected randomly. Second, 600 people aged 65 years or above who received  
29  
30 health examinations were randomly selected from every community health service centre.  
31  
32 Elderly people in the study communities who met the following criteria were included in the  
33  
34 survey: (1) aged 65 years and older; (2) residence in the area for at least half a year; (3) no  
35  
36 communication disorders or mental illnesses; and (4) willingness to complete the survey.  
37  
38  
39 Individuals were excluded if they did not meet one of the above requirements.  
40  
41  
42  
43  
44

### 45 **Patient and public involvement**

46  
47 No patient involved  
48  
49  
50  
51

### 52 **Study design and instrument**

53  
54 A cross-sectional study was used to collect data from the elderly population through  
55  
56 face-to-face interviews with a structured questionnaire. Based on the actual conditions of  
57  
58 elderly people in Shenzhen and the context of China healthcare, we designed the  
59  
60

questionnaire according to the previous literatures.<sup>18-21</sup> The questionnaire included four sections: (1) demographic characteristics, such as gender, age, residence, duration of residence in Shenzhen, education level, marital status, medical insurance, and family annual income per capita, (2) health-related characteristics, including self-perceived health status, smoking and alcohol consumption habits, and previous history of TB, (3) knowledge, attitudes, and practice (KAP) for TB prevention and control,<sup>22</sup> and (4) medical care-seeking willingness for TB and specific reasons for being unwilling to seek medical care for TB (Appendix). In the section of TB KAP, incorrect, inappropriate, or uncertain (did not know) responses were given a 0 score, while 1 point was given for choosing the correct or appropriate answer; a correct or appropriate response was based on current literature and best practice. Respondents who answered 60% of the KAP questions correctly or appropriately were considered aware of TB or to have positive attitudes or practices regarding TB.

### **Data collection and quality control**

The questionnaire was designed based on literature review, group discussions, and mock interviews. A pilot study was conducted at one of the community health service centres in Bao'an District of Shenzhen to improve the quality of the questionnaire. The questionnaire reported a good validity among elderly people. The data were collected by trained investigators through field questionnaire survey. A logic check of all data was undertaken to determine if there were any contradictions. The logical errors were identified as some mismatched socio-demographic characteristics for individuals. For example, an individual aged 70 years old reported the duration of residence in Shenzhen was more than 70 years.

### **Statistical analysis**

All statistical procedures were performed using the SPSS V.22.0 software. The descriptive



1  
2  
3  
4 statistics were presented as the number of observations with percentage (%).  $\chi^2$  tests were  
5  
6 conducted to compare the willingness of the elderly to seek medical care for TB between  
7  
8 groups. A binary stepwise logistic regression model was used to analyze the factors associated  
9  
10 with the medical care-seeking willingness for TB of the elderly (level for selection and  
11  
12 elimination:  $P=0.05$  and  $P=0.10$ , respectively), including neutral or unwillingness attitude as  
13  
14 the reference category. In the binary model, independent variables included: age (65~70,  
15  
16 71~75, > 75), gender (male, female), residence (local residents, others), education (primary  
17  
18 school or below, junior or senior middle school, college degree or above), marital status  
19  
20 (married, unmarried/widow/divorced), medical insurance (yes, no), family annual income per  
21  
22 capita (< 50,000 ¥, 50,000~100,000 ¥, 100,000~200,000 ¥, > 200,000 ¥), self-perceived  
23  
24 health status (good, fair, bad), smoking status (current smoker, former smoker, never smoker),  
25  
26 alcohol intake (current drinker, former drinker, never drinker), TB knowledge scores (< 3,  $\geq$   
27  
28 3), TB attitudes scores (< 3,  $\geq$  3), and TB practice scores (< 4,  $\geq$  4). Odds ratio (OR) and 95%  
29  
30 CI for each variable were calculated. All tests were two-sided with a significance level of  
31  
32 0.05.  
33  
34  
35  
36  
37  
38  
39  
40

## 41 Results

42  
43 Initially, 1,200 elderly people were recruited in the survey, of whom 11 (0.92%) refused to  
44  
45 participate in the study. Based on the inclusion and exclusion criteria, 1,172 participants were  
46  
47 included in the analyses. Because the previous history of TB might influence the medical  
48  
49 care-seeking willingness for TB, we further excluded 35 participants who had previously been  
50  
51 treated for TB. Then, we deleted 8 questionnaires due to missing data on medical care-seeking  
52  
53 willingness for TB. Additionally, 6 questionnaires with logical errors were discarded. Finally,  
54  
55 1,123 eligible questionnaires remained for analysis.  
56  
57  
58  
59  
60

1  
2  
3  
4 The characteristics of participants are reported in Table 1. Among 1,123 participants  
5 (response rate, 94.45%), 505 (45.3%) were males and 584 (52.5%) were aged 65~70 years.  
6  
7 More than half (55.4%) of them were at primary school or below. The majority (78.8%) of  
8  
9 participants held non-Shenzhen household registrations, and 947 (89.0%) were married. Most  
10  
11 (73.3%) elderly people had medical insurance. There were 398 (37.8%) respondents with  
12  
13 family annual income per capita lower than 50,000 ¥. Less than half (48.1%) of elderly people  
14  
15 reported having a good self-perceived health status. Only 119 (10.7%) or 106 (9.5%) were  
16  
17 current cigarette smokers or alcohol drinkers, respectively. The knowledge awareness rate for  
18  
19 TB among elderly people was 69.1%. The percentages of elderly people who had positive  
20  
21 attitudes or practices were 48.0% and 42.2% respectively.  
22  
23  
24  
25

26  
27 A total of 943 (84.0%) elderly people over 65 years chose to seek medical care when they  
28  
29 exhibited TB suspicious symptoms, whereas 155 (13.8%) were unwilling to seek treatment.  
30  
31 Additionally, when we investigated the reasons for unwillingness to seek medical care for TB,  
32  
33 82 (52.9%) reported "long treatment cycle and heavy financial burden" was the main reason  
34  
35 (Table 2).  
36  
37

38  
39 Table 3 demonstrates results comparing the differences in willingness to seek medical  
40  
41 care for TB among various groups. There were significant differences in the willingness of  
42  
43 the elderly to seek medical care for TB across scores for TB KAP ( $P < 0.05$ ). There were no  
44  
45 significant differences in the willingness of the elderly to seek medical care for TB across  
46  
47 genders, ages, residences, education levels, marital statuses, medical insurance statuses,  
48  
49 family annual incomes per capita, self-perceived health statuses, tobacco use, alcohol  
50  
51 consumption ( $P > 0.05$ ).  
52  
53

54  
55 Table 4 shows results from the binary logistic regression analysis to determine factors  
56  
57 associated with the medical care-seeking willingness for TB among the elderly. Family  
58  
59 annual income per capita (50,000~100,000 ¥: OR = 2.56, 95% CI: 1.44–4.54), attitudes ( $\geq 3$ :  
60

1  
2  
3  
4 OR = 3.10, 95% CI: 1.90–5.05) and practices scores ( $\geq 4$ : OR = 3.13, 95% CI: 1.82–5.39)  
5  
6 towards TB were significant predictors of elderly people's medical care-seeking willingness  
7  
8 for TB.  
9

## 13 Discussion

15 This was the first study to investigate the willingness of the elderly to seek medical care for  
16  
17 TB in China. We found that 84.0% of participants were willing to seek medical care for TB,  
18  
19 while 13.8% were unwilling to seek medical care for TB. Individuals with suspicious  
20  
21 symptoms of TB who do not seek medical care for TB will miss the opportunity for early  
22  
23 detection of TB, which leads to the delayed treatment and poor prognosis.<sup>23-25</sup> In addition,  
24  
25 unwillingness to seek medical care may increase the potential risk of transmission and will  
26  
27 have a negative impact on their families and the society.<sup>26</sup>  
28  
29

31 Our findings showed that the main reasons for being unwilling to seek medical care for  
32  
33 TB were "long treatment cycle and heavy economic burden". This indicated that an  
34  
35 individual's economic situation impacts their willingness to seek treatment. In China, the  
36  
37 policy that TB diagnosis and anti-TB drugs were free was not well understood and was even  
38  
39 in doubt for its authenticity.<sup>27,28</sup> In addition, the free items provided by the government  
40  
41 accounted for less than 40% of the total cost of TB diagnosis and treatment, meaning that TB  
42  
43 patients still need to pay more than half of the total cost.<sup>29</sup> This may explain the effects of  
44  
45 economic situation on medical care-seeking willingness for TB. Similarly, the economic  
46  
47 burden has been found to be a key factor hindering the health-seeking behaviours among TB  
48  
49 patients, as well as a primary concern for TB control in India,<sup>23</sup> Indonesia,<sup>30</sup> Malawi,<sup>31</sup> the  
50  
51 Middle East, and North Africa.<sup>32</sup> To reduce the economic burden on TB patients, it is  
52  
53 important for the government to expand health insurance coverage and lower the costs of TB  
54  
55 treatment. The economic factor was further supported by the multivariate analysis result that  
56  
57  
58  
59  
60

1  
2  
3  
4 family annual income per capita affected the willingness of the elderly to seek treatment.

5  
6 However, the significant association between family annual income per capita and the  
7  
8 medical care-seeking willingness was only shown in the elderly population who had  
9  
10 50,000~100,000 ¥ of family annual income per capita. The percentage of the elderly whose  
11  
12 family annual income per capita were more than 100.000 ¥ was relatively low in our study.  
13  
14 Income was a sensitive topic and elderly people may underreport it. Thus, the effects of high  
15  
16 family annual income per capita on the medical care-seeking willingness may have been  
17  
18 underestimated in this study.  
19  
20

21  
22 Many participants have worried about being discriminated for visiting TB prevention and  
23  
24 treatment institutions, which was also an important factor hindering their willingness to seek  
25  
26 treatment. This was consistent with the previous findings in South African,<sup>33</sup> Ethiopia,<sup>34</sup> India,  
27  
28 Bangladesh, Malawi, and Columbia.<sup>35</sup> Previous studies have shown that TB patients suffered  
29  
30 from widespread discriminatory and differential treatment due to the long-term stereotypes  
31  
32 about TB.<sup>33,36</sup> The fear of being discriminated can affect the elderly's medical care-seeking  
33  
34 willingness, health-seeking behaviours, and compliance during the treatment process.<sup>9,33,37</sup> In  
35  
36 addition, evidence has shown that TB stigma was associated with patient delay and diagnostic  
37  
38 delay.<sup>9</sup> Available evidence suggested that measures aimed at empowering TB patients to  
39  
40 resist stigmatizing perceptions, as well as making efforts to change norms about TB, can be  
41  
42 effective to reduce the stigma attitude towards TB.<sup>38</sup> In order to increase the willingness of the  
43  
44 elderly population to seek medical care and enable them to receive timely treatment, it is  
45  
46 crucial to further popularize knowledge about TB and eliminate denigration and  
47  
48 stigmatization of TB through a variety of effective educational methods.  
49  
50  
51

52  
53 The results of the multivariate analysis showed that higher scores on attitudes and  
54  
55 behaviours related to TB prevention and control were associated with greater willingness to  
56  
57 seek medical care for TB. However, the prevalence of positive attitudes and practice towards  
58  
59  
60

1  
2  
3  
4 TB was at a low level. Therefore, measures should be taken to improve TB-related attitudes  
5  
6 and behaviours among the elderly, which may be helpful to increase the medical care-seeking  
7  
8 willingness for TB. Intriguingly, we found that TB knowledge scores were not a significant  
9  
10 determinant of the medical care-seeking willingness in the multivariable analysis, which was  
11  
12 not in line with previous studies.<sup>9,25,26,32,39</sup> Association between TB knowledge and medical  
13  
14 care-seeking willingness needs further research.  
15  
16

17  
18 There were several strengths in this study. First, this was the first study to investigate the  
19  
20 willingness of the elderly to seek medical care for TB in China. Second, our research found  
21  
22 some important factors were associated with the medical care-seeking willingness, which  
23  
24 could provide reference for TB control policies among elderly people. However, some  
25  
26 limitations should be noted that the potential influencing factors of medical care-seeking  
27  
28 willingness were possibly more than the ones we investigated in the study. Second, this was a  
29  
30 cross-sectional study, which was limited to identify causality of the observed relationships.  
31  
32 Third, this study enrolled only elderly people in Shenzhen, limiting the generalisability of  
33  
34 findings to other geographical regions.  
35  
36  
37  
38  
39

## 40 **Conclusion**

41  
42  
43 In summary, this study found that family annual income per capita and TB-related attitudes,  
44  
45 and practice were significant predictors of medical care-seeking willingness for TB among the  
46  
47 elderly population. It is necessary to promote the publicity of TB-related knowledge and  
48  
49 policies among the elderly. Measures must be taken to reduce the economic burden, clarify  
50  
51 social misconceptions about TB and eliminate discrimination against TB patients.  
52  
53  
54  
55

## 56 **Declarations**

## 57 **Acknowledgements**

1  
2  
3  
4 We thank the elderly population who participated in this research.  
5  
6  
7

### 8 **Contributors**

9  
10 YXW, JF, and YG conceived and designed the study. JF, XS, YZ, XM, HKD, and WQX  
11 participated in the acquisition of data. YXW and XS analyzed the data. ZHL, ZXL, XJW, and  
12 YG gave advice on methodology. YXW and JF wrote the draft of the paper. All authors  
13 contributed to writing, reviewing, or revising the paper and read and approved the final  
14 manuscript. YG is the guarantor of this work and has full access to all the data in the study  
15 and takes responsibility for its integrity and the accuracy of the data analysis.  
16  
17  
18  
19  
20  
21  
22  
23  
24  
25

### 26 **Funding**

27  
28 This work was supported by National Science and Technology Major Project of the Ministry  
29 of Science and Technology of China (2018ZX10715004), Natural Science Foundation of  
30 Hubei Province (2020CFB218), Health Commission of Hubei Province Scientific Research  
31 Project (WJ2019H400), and Scientific Research Fund of Wuhan Municipal Health  
32 Commission (WG19Q03).  
33  
34  
35  
36  
37  
38  
39  
40  
41  
42

### 43 **Competing interests**

44  
45 We declare that we have no conflict of interests.  
46  
47  
48

### 49 **Patient consent for publication**

50  
51 Not required.  
52  
53  
54  
55

### 56 **Ethics approval**

1  
2  
3  
4 The study was approved by the Ethics Committee of the Tongji Medical College Institutional  
5  
6 Review Board, Huazhong University of Science and Technology, Wuhan, China. Informed  
7  
8 consent was obtained from all survey participants.  
9

### 10 11 12 13 **Data sharing statement**

14  
15 Data may be made available by contacting the corresponding author.  
16  
17

### 18 19 20 **Word count**

21  
22 2629 words  
23  
24  
25  
26  
27  
28  
29  
30  
31  
32  
33  
34  
35  
36  
37  
38  
39  
40  
41  
42  
43  
44  
45  
46  
47  
48  
49  
50  
51  
52  
53  
54  
55  
56  
57  
58  
59  
60

For peer review only

## References

1. World Health Organization. *Global tuberculosis report 2020*. Geneva: World Health Organization, 2020. <https://www.who.int/publications/i/item/9789240013131>
2. World Health Organization. *China country assessment report on ageing and health*. Geneva: World Health Organization, 2015. <https://www.who.int/ageing/publications/china-country-assessment/zh/>
3. Wang Y. Data compilation of the fifth national tuberculosis epidemiological sampling survey in China. *Beijing: Military Medical Science Press* 2011.
4. Chen W, Zhang H, Du X, et al. Characteristics and Morbidity of the Tuberculosis Epidemic — China, 2019. *China CDC Weekly* 2020;2(12):181-4.
5. General Office of the State Council of the People's Republic of China. National Tuberculosis Prevention and Control Plan (2011-2015). [http://www.gov.cn/zhengce/content/2011-12/06/content\\_6143.htm](http://www.gov.cn/zhengce/content/2011-12/06/content_6143.htm). Accessed 15 Dec 2020
6. Li Y, Wang Z, Geng H. Current status and influencing factors of delayed visits to elderly pulmonary tuberculosis patients in Shandong Province. *Chin J Gerontology* 2013;33(05):1125-7.
7. Yang J, Du Y, Zhao Y, et al. Patient delay and the impact factors for senile pulmonary tuberculosis in rural area. *Chin Rural Health Serv Admin* 2010;30(04):300-2.
8. Shen H, Du Y, Zhang G, et al. Influencing factors of pulmonary tuberculosis patient delay in Guangzhou, 2008-2018. *Chin J Antituberc* 2020;42(05):510-7.
9. Li Y, Ehiri J, Tang S, et al. Factors associated with patient, and diagnostic delays in Chinese TB patients: a systematic review and meta-analysis. *BMC Med* 2013;11:156.
10. Shenzhen Bureau of Statistics, Shenzhen Investigation Team of National Bureau of Statistics. Shenzhen Statistical Yearbook 2020. *Beijing: China Statistics Press* 2020.



- 1  
2  
3  
4 11. Huang Y, Huang J, Su X, et al. Analysis of the economic burden of diagnosis and  
5  
6 treatment on patients with tuberculosis in Bao'an district of Shenzhen City, China.  
7  
8 *PLoS One* 2020;15(8):e0237865.  
9
- 10  
11 12. Xu X, Liu J, Cao S, et al. Delays in care seeking, diagnosis and treatment among  
12  
13 pulmonary tuberculosis patients in Shenzhen, China. *Int J Tuberc Lung Dis*  
14  
15 2013;17(5):615-20.  
16
- 17  
18 13. China Tuberculosis Control Collaboration. The effect of tuberculosis control in China.  
19  
20 *Lancet* 2004;364(9432):417-22.  
21
- 22  
23 14. Zhu L, Yang Y, Guan H, et al. Trends in drug-resistant tuberculosis after the  
24  
25 implementation of the DOTS strategy in Shenzhen, China, 2000-2013. *Int J Tuberc*  
26  
27 *Lung Dis* 2017;21(7):759-65.  
28
- 29  
30 15. Tang Y, Zhao M, Wang Y, et al. Non-adherence to anti-tuberculosis treatment among  
31  
32 internal migrants with pulmonary tuberculosis in Shenzhen, China: a cross-sectional  
33  
34 study. *BMC Public Health* 2015;15:474.  
35
- 36  
37 16. Lu H, Yan F, Wang W, et al. Do transportation subsidies and living allowances  
38  
39 improve tuberculosis control outcomes among internal migrants in urban Shanghai,  
40  
41 China? *Western Pac Surveill Response J* 2013;4(1):19-24.  
42
- 43  
44 17. Liu Q, Smith H, Wang Y, et al. Tuberculosis patient expenditure on drugs and tests in  
45  
46 subsidised, public services in China: a descriptive study. *Trop Med Int Health*  
47  
48 2010;15(1):26-32.  
49
- 50  
51 18. Zhao M, Wang W, Tang Y, et al. Survey on knowledge, attitude and practice about  
52  
53 tuberculosis prevention and treatment among residents in Bao'an District of Shenzhen.  
54  
55 *J Clin Pulm Med* 2015;20(09):1567-71.  
56
- 57  
58 19. National Health and Family Planning Commission of the People's Republic of China.  
59  
60 Notice of the National Health and Family Planning Commission of the People's

1  
2  
3  
4 Republic of China on the issuance of the work plan for the dissemination of  
5  
6 knowledge on tuberculosis prevention and control by millions of volunteers and the  
7  
8 core information and knowledge points on tuberculosis prevention and control.  
9  
10 <http://www.nhc.gov.cn/jkj/s3589/201604/2dd6a74584d34a6ba0dd863544e83416.shtml>  
11  
12

13 I. Accessed 10 July 2021  
14

- 15 20. Ma J. Study on the elderly pulmonary tuberculosis epidemic characteristic in  
16  
17 Dongchuan district and awareness of tuberculosis prevention and control knowledge.  
18  
19 Kunming: Kunming Medical University 2015.  
20  
21
- 22 21. Lu C, Che X, Li M, et al. Investigation on public awareness in key information of  
23  
24 tuberculosis prevention and control in Shenzhen. *J Tuberc Lung Health*  
25  
26 2019;8(4):259-64.  
27  
28
- 29 22. Wang Y, Gan Y, Zhang J, et al. Analysis of the current status and associated factors of  
30  
31 tuberculosis knowledge, attitudes, and practices among elderly people in Shenzhen: a  
32  
33 cross-sectional study. *BMC Public Health* 2021;21(1):1163.  
34  
35
- 36 23. Thomas BE, Thiruvengadam K, S R, et al. Understanding health care-seeking  
37  
38 behaviour of the tribal population in India among those with presumptive TB  
39  
40 symptoms. *PLoS One* 2021;16(5):e0250971.  
41  
42
- 43 24. Helfinstein S, Engl E, Thomas BE, et al. Understanding why at-risk population  
44  
45 segments do not seek care for tuberculosis: a precision public health approach in  
46  
47 South India. *BMJ Glob Health* 2020;5(9):e002555.  
48  
49
- 50 25. Tong Y, Guan X, Hou S, et al. Determinants of Health Care-Seeking Delay among  
51  
52 Tuberculosis Patients in Rural Area of Central China. *Int J Environ Res Public Health*  
53  
54 2018;15(9):1998.  
55  
56  
57  
58  
59  
60

- 1  
2  
3  
4 26. Obsa MS, Daga WB, Wosene NG, et al. Treatment seeking delay and associated  
5 factors among tuberculosis patients attending health facility in Ethiopia from 2000 to  
6 2020: A systematic review and meta analysis. *PLoS One* 2021;16(7):e0253746.  
7  
8  
9  
10 27. Chen X, Wang W, Wang X, et al. Public Awareness of Tuberculosis in Southeast  
11 China: A Population-Based Study. *Int J Environ Res Public Health* 2019;16(21):4290.  
12  
13  
14  
15 28. Wang J, Fei Y, Shen H, et al. Gender difference in knowledge of tuberculosis and  
16 associated health-care seeking behaviors: a cross-sectional study in a rural area of  
17 China. *BMC Public Health* 2008;8:354.  
18  
19  
20  
21  
22 29. Li Y, Li X, Xie HB, et al. Analysis on the reimbursement situation of TB treatment  
23 costs in the new rural cooperative medical system. *Chin J Antituberc*  
24 2010;32(11):685-9.  
25  
26  
27  
28  
29 30. Rintiswati N, Mahendradhata Y, Suharna, et al. Journeys to tuberculosis treatment: a  
30 qualitative study of patients, families and communities in Jogjakarta, Indonesia. *BMC*  
31 *Public Health* 2009;9:158.  
32  
33  
34  
35  
36 31. Meghji J, Gregorius S, Madan J, et al. The long term effect of pulmonary tuberculosis  
37 on income and employment in a low income, urban setting. *Thorax*  
38 2021;76(4):387-95.  
39  
40  
41  
42  
43 32. Eltayeb D, Pietersen E, Engel M, et al. Factors associated with tuberculosis diagnosis  
44 and treatment delays in Middle East and North Africa: a systematic review. *East*  
45 *Mediterr Health J* 2020;26(4):477-86.  
46  
47  
48  
49  
50 33. Cramm JM, Finkenflügel HJ, Møller V, et al. TB treatment initiation and adherence in  
51 a South African community influenced more by perceptions than by knowledge of  
52 tuberculosis. *BMC Public Health* 2010;10:72.  
53  
54  
55  
56  
57 34. Datiko DG, Jerene D, Suarez P. Stigma matters in ending tuberculosis: Nationwide  
58 survey of stigma in Ethiopia. *BMC Public Health* 2020;20(1):190.  
59  
60

- 1  
2  
3  
4 35. Somma D, Thomas BE, Karim F, et al. Gender and socio-cultural determinants of  
5  
6 TB-related stigma in Bangladesh, India, Malawi and Colombia. *Int J Tuberc Lung Dis*  
7  
8 2008;12(7):856-66.  
9
- 10 36. Mushtaq MU, Shahid U, Abdullah HM, et al. Urban-rural inequities in knowledge,  
11  
12 attitudes and practices regarding tuberculosis in two districts of Pakistan's Punjab  
13  
14 province. *Int J Equity Health* 2011;10:8.  
15  
16
- 17 37. Kane JC, Elafros MA, Murray SM, et al. A scoping review of health-related stigma  
18  
19 outcomes for high-burden diseases in low- and middle-income countries. *BMC Med*  
20  
21 2019;17(1):17.  
22  
23
- 24 38. Courtwright A, Turner AN. Tuberculosis and stigmatization: pathways and  
25  
26 interventions. *Public Health Rep* 2010;125 Suppl 4(Suppl 4):34-42.  
27  
28
- 29 39. Chibatata NBW, Zhou CM, Chibatata CM, et al. Post-2015, why delay to seek  
30  
31 healthcare? Perceptions and field experiences from TB healthcare providers in  
32  
33 northern Malawi: a qualitative study. *Infect Dis Poverty* 2017;6(1):60.  
34  
35  
36  
37  
38  
39  
40  
41  
42  
43  
44  
45  
46  
47  
48  
49  
50  
51  
52  
53  
54  
55  
56  
57  
58  
59  
60

**Table 1 Characteristics of the study population\***

| Variables                      | N    | %     |
|--------------------------------|------|-------|
| Total                          | 1123 | 100.0 |
| Age, y                         |      |       |
| 65~70                          | 584  | 52.5  |
| 71~75                          | 312  | 28.0  |
| >75                            | 217  | 19.5  |
| Gender                         |      |       |
| Male                           | 505  | 45.3  |
| Female                         | 611  | 54.7  |
| Residence                      |      |       |
| Local residents                | 232  | 21.2  |
| Others                         | 862  | 78.8  |
| Education level                |      |       |
| Primary school or below        | 605  | 55.4  |
| Junior or senior middle school | 423  | 38.7  |
| College degree or above        | 64   | 5.9   |
| Marital status                 |      |       |
| Married                        | 947  | 89.0  |
| Unmarried/widow/divorced       | 117  | 11.0  |
| Medical insurance              |      |       |
| Yes                            | 779  | 73.3  |

|                                     |     |      |
|-------------------------------------|-----|------|
| No                                  | 284 | 26.7 |
| Family annual income per capita (¥) |     |      |
| <50,000                             | 398 | 37.8 |
| 50,000~100,000                      | 342 | 32.4 |
| 100,000~200,000                     | 221 | 21.0 |
| > 200,000                           | 93  | 8.8  |
| Self-perceived health status        |     |      |
| Good                                | 505 | 48.1 |
| Fair                                | 476 | 45.3 |
| Bad                                 | 69  | 6.6  |
| Smoking status                      |     |      |
| Current smoker                      | 119 | 10.7 |
| Former smoker                       | 92  | 8.3  |
| Never smoker                        | 902 | 81.0 |
| Alcohol intake                      |     |      |
| Current Drinker                     | 106 | 9.5  |
| Former drinker                      | 82  | 7.3  |
| Never drinker                       | 931 | 83.2 |
| TB knowledge scores                 |     |      |
| < 3                                 | 333 | 30.9 |
| ≥ 3                                 | 746 | 69.1 |
| TB attitudes scores                 |     |      |

|                    |     |      |
|--------------------|-----|------|
| < 3                | 546 | 52.0 |
| ≥ 3                | 505 | 48.0 |
| TB practice scores |     |      |
| < 4                | 555 | 57.8 |
| ≥ 4                | 406 | 42.2 |

\*Missing number of participants: age: 10; gender: 7; residence: 29; education level: 31; marital status: 59; medical insurance: 60; family annual income per capita: 69; self-perceived health status: 73; smoking status: 10; alcohol consumption habits: 4; TB knowledge scores: 44; TB attitudes scores: 72; TB practice scores: 162.

Abbreviation: TB, tuberculosis.

**Table 2 Distribution according to the reasons of unwillingness to seek medical care for TB among elderly population (N=155)**

| Items                                                                          | N  | %    |
|--------------------------------------------------------------------------------|----|------|
| Lack of trust in the medical level of TB prevention and treatment institutions | 40 | 25.8 |
| Poor attitude of medical staff                                                 | 8  | 5.2  |
| Long treatment time and heavy economic burden                                  | 82 | 52.9 |
| Fear of discrimination                                                         | 46 | 29.7 |
| Others                                                                         | 55 | 35.5 |

Abbreviation: TB, tuberculosis.



**Table 3 Factors associated with medical care-seeking willingness for tuberculosis among elderly population\***

| Variables                      | Willing    | Neutral   | Unwilling  | $\chi^2$ | <i>P</i> |
|--------------------------------|------------|-----------|------------|----------|----------|
| Total                          | 943 (84.0) | 25 (2.2)  | 155 (13.8) |          |          |
| Age, y                         |            |           |            |          |          |
| 65~70                          | 490 (52.4) | 12 (48.0) | 82 (53.9)  | 1.74     | 0.78     |
| 71~75                          | 262 (28.0) | 6 (24.0)  | 44 (28.9)  |          |          |
| >75                            | 184 (19.7) | 7 (28.0)  | 26 (17.1)  |          |          |
| Gender                         |            |           |            |          |          |
| Male                           | 430 (45.9) | 12 (48.0) | 63 (40.6)  | 1.58     | 0.45     |
| Female                         | 506 (54.1) | 13 (52.0) | 92 (59.4)  |          |          |
| Residence                      |            |           |            |          |          |
| Local residents                | 185 (20.2) | 9 (36.0)  | 38 (24.8)  | 5.04     | 0.08     |
| Others                         | 731 (79.8) | 16 (64.0) | 115 (75.2) |          |          |
| Education level                |            |           |            |          |          |
| Primary school or below        | 503 (54.9) | 13 (54.2) | 89 (58.9)  | 3.23     | 0.52     |
| Junior or senior middle school | 363 (39.6) | 10 (41.7) | 50 (33.1)  |          |          |
| College degree or above        | 51 (5.6)   | 1 (4.2)   | 12 (7.9)   |          |          |
| Marital status                 |            |           |            |          |          |
| Married                        | 795 (89.1) | 22 (91.7) | 130 (87.8) | 0.39     | 0.82     |
| Unmarried/widow/divorced       | 97 (10.9)  | 2 (8.3)   | 18 (12.2)  |          |          |

1  
2  
3  
4  
5  
6  
7  
8  
9  
10  
11  
12  
13  
14  
15  
16  
17  
18  
19  
20  
21  
22  
23  
24  
25  
26  
27  
28  
29  
30  
31  
32  
33  
34  
35  
36  
37  
38  
39  
40  
41  
42  
43  
44  
45  
46  
47  
48  
49  
50  
51  
52  
53  
54  
55  
56  
57  
58  
59  
60

---

|                                     |            |           |            |       |       |  |
|-------------------------------------|------------|-----------|------------|-------|-------|--|
| Medical insurance                   |            |           |            |       |       |  |
| Yes                                 | 657 (73.7) | 19 (79.2) | 103 (69.6) | 1.55  | 0.46  |  |
| No                                  | 234 (26.3) | 5 (20.8)  | 45 (30.4)  |       |       |  |
| Family annual income per capita (¥) |            |           |            |       |       |  |
| < 50,000                            | 337 (38.0) | 9 (39.1)  | 52 (36.1)  | 9.39  | 0.15  |  |
| 50,000~100,000                      | 300 (33.8) | 5 (21.7)  | 37 (25.7)  |       |       |  |
| 100,000~200,000                     | 173 (19.5) | 7 (30.4)  | 41 (28.5)  |       |       |  |
| > 200,000                           | 77 (8.7)   | 2 (8.7)   | 14 (9.7)   |       |       |  |
| Self-perceived health status        |            |           |            |       |       |  |
| Good                                | 420 (47.8) | 11 (50.0) | 74 (49.7)  | 1.16  | 0.89  |  |
| Fair                                | 403 (45.8) | 10 (45.5) | 63 (42.3)  |       |       |  |
| Bad                                 | 56 (6.4)   | 1 (4.5)   | 12 (8.1)   |       |       |  |
| Smoking status                      |            |           |            |       |       |  |
| Current smoker                      | 105 (11.3) | 3 (12.0)  | 11 (7.1)   | 4.73  | 0.32  |  |
| Former smoker                       | 78 (8.4)   | 0 (0.0)   | 14 (9.0)   |       |       |  |
| Never smoker                        | 750 (80.4) | 22 (88.0) | 130 (83.9) |       |       |  |
| Alcohol intake                      |            |           |            |       |       |  |
| Current Drinker                     | 91 (9.7)   | 4 (16.0)  | 11 (7.1)   | 2.39  | 0.67  |  |
| Former drinker                      | 68 (7.2)   | 2 (8.0)   | 12 (7.7)   |       |       |  |
| Never drinker                       | 780 (83.1) | 19 (76.0) | 132 (85.2) |       |       |  |
| TB knowledge scores                 |            |           |            |       |       |  |
| < 3                                 | 249 (27.5) | 12 (50.0) | 72 (48.3)  | 30.25 | <0.01 |  |

---

1  
2  
3  
4  
5  
6  
7  
8  
9  
10  
11  
12  
13  
14  
15  
16  
17  
18  
19  
20  
21  
22  
23  
24  
25  
26  
27  
28  
29  
30  
31  
32  
33  
34  
35  
36  
37  
38  
39  
40  
41  
42  
43  
44  
45  
46  
47  
48  
49  
50  
51  
52  
53  
54  
55  
56  
57  
58  
59  
60

---

|                     |            |           |            |       |         |
|---------------------|------------|-----------|------------|-------|---------|
| $\geq 3$            | 657 (72.5) | 12 (50.0) | 77 (51.7)  |       |         |
| TB attitudes scores |            |           |            |       |         |
| $< 3$               | 417 (47.3) | 15 (65.2) | 114 (77.6) | 47.74 | $<0.01$ |
| $\geq 3$            | 464 (52.7) | 8 (34.8)  | 33 (22.4)  |       |         |
| TB practice scores  |            |           |            |       |         |
| $< 4$               | 433 (53.6) | 18 (85.7) | 104 (78.8) | 36.41 | $<0.01$ |
| $\geq 4$            | 375 (46.4) | 3 (14.3)  | 28 (21.2)  |       |         |

---

\*Missing number of participants: age: 10; gender: 7; residence: 29; education level: 31; marital status: 59; medical insurance: 60; family annual income per capita: 69; self-perceived health status: 73; smoking status: 10; alcohol consumption habits: 4; TB knowledge scores: 44; TB attitudes scores: 72; TB practice scores: 162.

Abbreviation: TB, tuberculosis.

**Table 4 Binary logistic regression analysis for the association with medical care-seeking willingness for tuberculosis among elderly population\***

| Variables                                           | <i>B</i> | SE   | <i>Wald</i> $\chi^2$ | <i>P</i> | OR (95% CI)      |
|-----------------------------------------------------|----------|------|----------------------|----------|------------------|
| Family annual income per capita (¥) (ref: < 50,000) |          |      |                      |          |                  |
| 50,000~100,000                                      | 0.94     | 0.29 | 10.37                | <0.01    | 2.56 (1.44–4.54) |
| 100,000~200,000                                     | -0.10    | 0.26 | 0.15                 | 0.69     | 0.90 (0.54–1.51) |
| > 200,000                                           | 0.29     | 0.39 | 0.57                 | 0.45     | 1.34 (0.63–2.86) |
| TB attitudes scores (ref: < 3)                      |          |      |                      |          |                  |
| ≥ 3                                                 | 1.13     | 0.25 | 20.51                | <0.01    | 3.10 (1.90–5.05) |
| TB practice scores (ref: < 4)                       |          |      |                      |          |                  |
| ≥ 4                                                 | 1.14     | 0.28 | 16.93                | <0.01    | 3.13 (1.82–5.39) |

\*Adjustment for age (65~70, 71~75, > 75), gender (male, female), residence (local residents, others), education (primary school or below, junior or senior middle school, college degree or above), marital status (married, unmarried/widow/divorced), medical insurance (yes, no), self-perceived health status (good, fair, bad), smoking status (current smoker, former smoker, never smoker), alcohol intake (current drinker, former drinker, never drinker), TB knowledge scores (< 3, ≥ 3), and other variables in the model.

Abbreviation: OR, odds ratio; SE, standard error; TB, tuberculosis.

## A survey of the elderly's awareness and health-related practices of tuberculosis

### Socio-demographic information section:

1. Age: \_\_ years old.

2. Gender:

Male

Female

3. Are you a local resident?

Yes

No

4. Your duration of residence in Shenzhen is \_\_ years \_\_ months.

5. Education level:

Illiteracy

Primary school

Junior high school

High school / Secondary school

Junior college

Undergraduate or higher

1  
2  
3  
4  
5  
6 6. Marital status:  
7

8  
9  Unmarried

10  
11  Married

12  
13  Divorced

14  
15  Widowed  
16  
17  
18  
19  
20  
21

22 7. Medical insurance:  
23

24  Basic medical insurance for urban and rural residents (including New rural cooperative  
25 medical insurance)  
26  
27

28  Medical insurance for urban employee  
29

30  Commercial insurance  
31

32  Free medical services  
33

34  No medical insurance  
35  
36  
37  
38  
39  
40  
41  
42

43 8. Family annual income per capita (RMB):  
44

45  Less than 50,000  
46

47  50,000 to 100,000  
48

49  100,000 to 200,000  
50

51  200,000 to 500,000  
52

53  More than 500,000  
54  
55  
56  
57  
58  
59  
60

**Health-related characteristic section:**

1. How do you feel your current health status?

Very good

Relatively good

Fair

Relatively bad

Very bad

2. Are you a smoker?

Yes

Former smoker

No

3. Do you drink alcohol?

Yes

Former drinker

No

4. Have you previously been treated for TB?

Yes

No

1  
2  
3  
4 **Tuberculosis knowledge, attitudes, and practices section:**  
5

6 **Knowledge**  
7

8  
9 1. Infectivity of TB  
10

11  Yes  
12

13  No  
14

15  Do not know  
16  
17  
18  
19

20  
21  
22 2. Route of TB transmission  
23

24  Touching items  
25

26  Sharing utensils  
27

28  Coughing or sneezing  
29

30  All of the above  
31

32  Do not know  
33  
34  
35  
36  
37  
38  
39

40 3. TB symptoms  
41

42  Headache or dizziness  
43

44  Coughing for longer than 2 weeks or coughing up blood  
45

46  Abdominal pain or diarrhoea  
47

48  Do not know  
49  
50  
51  
52  
53  
54

55 4. Prevention and control of TB  
56

57  Covering mouth and nose when coughing or sneezing  
58  
59  
60



- 1  
2  
3  
4  Wearing a mask  
5  
6  Good nutrition  
7  
8  
9  Washing hands after touching items in public  
10  
11  
12  All of the above  
13  
14  
15

16  
17 5. Curability of TB  
18

- 19  Yes  
20  
21  
22  No  
23  
24  
25  Do not know  
26  
27  
28  
29

30 **Attitudes**  
31

32 1. Do you think that TB is a terrible disease?  
33

- 34  
35  Yes  
36  
37  No  
38  
39  
40  Do not sure  
41  
42  
43  
44

45 2. Would you like to learn about TB?  
46

- 47  
48  Yes  
49  
50  
51  No  
52  
53  Do not sure  
54  
55

56  
57  
58 3. Would you like to participate in TB education activities?  
59  
60

1  
2  
3  
4  Yes

5  
6  No

7  
8  
9  Do not sure

10  
11  
12  
13  
14 4. Are you willing to complete treatment if you have TB?

15  
16  
17  Yes

18  
19  No

20  
21  
22  Do not sure

23  
24  
25  
26  
27 5. Would you be willing to be screened for TB if you had suggestive symptoms?

28  
29  
30  Yes

31  
32  No

33  
34  
35  Do not sure

36  
37  
38  
39  
40 **Practices**

41  
42  
43 1. Have you ever taken the initiative to learn about TB?

44  
45  Yes

46  
47  No

48  
49  
50  Do not sure

51  
52  
53  
54  
55 2. Would you urge your friends with suspicious TB symptoms visit the doctor?

56  
57  
58  Yes

1  
2  
3  
4  No

5  
6  Do not sure  
7  
8  
9

10  
11 3. Would you visit a health facility if you had a cough for more than 2 weeks?  
12  
13

14  Yes

15  
16  No

17  
18  Do not sure  
19  
20  
21

22  
23  
24 4. Would you visit a health facility if you suspected that you had TB?  
25  
26

27  Yes

28  
29  No

30  
31  Do not sure  
32  
33  
34

35  
36  
37 5. Would you stop spitting in public?  
38  
39

40  Yes

41  
42  No

43  
44  Do not sure  
45  
46  
47

48  
49  
50 6. Would you cover your mouth and nose when coughing or sneezing?  
51  
52

53  Yes

54  
55  No

56  
57  Do not sure  
58  
59  
60

1  
2  
3  
4  
5  
6  
7 **Medical care-seeking willingness for TB section:**  
8

9 1. Were you willing to seek medical care if you suspected that you had TB?

10  
11  Yes (skip to 3)

12  
13  Neutral (skip to 3)

14  
15  No  
16  
17  
18

19  
20  
21  
22 2. Why were you unwilling to seek medical care if you suspected that you had TB?

23  
24 (Multiple choice)

25  
26  Lack of trust in the medical level of TB prevention and treatment institutions

27  
28  Poor attitude of medical staff

29  
30  Long treatment time and heavy economic burden

31  
32  Fear of discrimination

33  
34  Others: \_\_  
35  
36  
37  
38  
39  
40  
41  
42  
43  
44  
45  
46  
47  
48  
49  
50  
51  
52  
53  
54  
55  
56  
57  
58  
59  
60

**STROBE 2007 (v4) Statement—Checklist of items that should be included in reports of *cross-sectional studies***

| Section/Topic                | Item # | Recommendation                                                                                                                                                                       | Reported on page # |
|------------------------------|--------|--------------------------------------------------------------------------------------------------------------------------------------------------------------------------------------|--------------------|
| <b>Title and abstract</b>    | 1      | (a) Indicate the study's design with a commonly used term in the title or the abstract                                                                                               | 1, 2               |
|                              |        | (b) Provide in the abstract an informative and balanced summary of what was done and what was found                                                                                  | 2                  |
| <b>Introduction</b>          |        |                                                                                                                                                                                      |                    |
| Background/rationale         | 2      | Explain the scientific background and rationale for the investigation being reported                                                                                                 | 4, 5               |
| Objectives                   | 3      | State specific objectives, including any prespecified hypotheses                                                                                                                     | 4, 5               |
| <b>Methods</b>               |        |                                                                                                                                                                                      |                    |
| Study design                 | 4      | Present key elements of study design early in the paper                                                                                                                              | 6, 7               |
| Setting                      | 5      | Describe the setting, locations, and relevant dates, including periods of recruitment, exposure, follow-up, and data collection                                                      | 5, 6, 7            |
| Participants                 | 6      | (a) Give the eligibility criteria, and the sources and methods of selection of participants                                                                                          | 6                  |
| Variables                    | 7      | Clearly define all outcomes, exposures, predictors, potential confounders, and effect modifiers. Give diagnostic criteria, if applicable                                             | 6, 7, 8            |
| Data sources/<br>measurement | 8*     | For each variable of interest, give sources of data and details of methods of assessment (measurement). Describe comparability of assessment methods if there is more than one group | 7, 8               |
| Bias                         | 9      | Describe any efforts to address potential sources of bias                                                                                                                            | 8                  |
| Study size                   | 10     | Explain how the study size was arrived at                                                                                                                                            | 6                  |
| Quantitative variables       | 11     | Explain how quantitative variables were handled in the analyses. If applicable, describe which groupings were chosen and why                                                         | 8                  |
| Statistical methods          | 12     | (a) Describe all statistical methods, including those used to control for confounding                                                                                                | 7, 8               |
|                              |        | (b) Describe any methods used to examine subgroups and interactions                                                                                                                  | 8                  |
|                              |        | (c) Explain how missing data were addressed                                                                                                                                          | N/A                |
|                              |        | (d) If applicable, describe analytical methods taking account of sampling strategy                                                                                                   | N/A                |
|                              |        | (e) Describe any sensitivity analyses                                                                                                                                                | N/A                |
| <b>Results</b>               |        |                                                                                                                                                                                      |                    |

|                          |     |                                                                                                                                                                                                              |            |
|--------------------------|-----|--------------------------------------------------------------------------------------------------------------------------------------------------------------------------------------------------------------|------------|
| Participants             | 13* | (a) Report numbers of individuals at each stage of study—eg numbers potentially eligible, examined for eligibility, confirmed eligible, included in the study, completing follow-up, and analysed            | 8, 9       |
|                          |     | (b) Give reasons for non-participation at each stage                                                                                                                                                         | N/A        |
|                          |     | (c) Consider use of a flow diagram                                                                                                                                                                           | N/A        |
| Descriptive data         | 14* | (a) Give characteristics of study participants (eg demographic, clinical, social) and information on exposures and potential confounders                                                                     | 9          |
|                          |     | (b) Indicate number of participants with missing data for each variable of interest                                                                                                                          | N/A        |
| Outcome data             | 15* | Report numbers of outcome events or summary measures                                                                                                                                                         | 9, 10      |
| Main results             | 16  | (a) Give unadjusted estimates and, if applicable, confounder-adjusted estimates and their precision (eg, 95% confidence interval). Make clear which confounders were adjusted for and why they were included | 9, 10      |
|                          |     | (b) Report category boundaries when continuous variables were categorized                                                                                                                                    | 8          |
|                          |     | (c) If relevant, consider translating estimates of relative risk into absolute risk for a meaningful time period                                                                                             | N/A        |
| Other analyses           | 17  | Report other analyses done—eg analyses of subgroups and interactions, and sensitivity analyses                                                                                                               | N/A        |
| <b>Discussion</b>        |     |                                                                                                                                                                                                              |            |
| Key results              | 18  | Summarise key results with reference to study objectives                                                                                                                                                     | 12         |
| Limitations              | 19  | Discuss limitations of the study, taking into account sources of potential bias or imprecision. Discuss both direction and magnitude of any potential bias                                                   | 12         |
| Interpretation           | 20  | Give a cautious overall interpretation of results considering objectives, limitations, multiplicity of analyses, results from similar studies, and other relevant evidence                                   | 10, 11, 12 |
| Generalisability         | 21  | Discuss the generalisability (external validity) of the study results                                                                                                                                        | 12         |
| <b>Other information</b> |     |                                                                                                                                                                                                              |            |
| Funding                  | 22  | Give the source of funding and the role of the funders for the present study and, if applicable, for the original study on which the present article is based                                                | 13         |

\*Give information separately for cases and controls in case-control studies and, if applicable, for exposed and unexposed groups in cohort and cross-sectional studies.

**Note:** An Explanation and Elaboration article discusses each checklist item and gives methodological background and published examples of transparent reporting. The STROBE checklist is best used in conjunction with this article (freely available on the Web sites of PLoS Medicine at <http://www.plosmedicine.org/>, Annals of Internal Medicine at <http://www.annals.org/>, and Epidemiology at <http://www.epidem.com/>). Information on the STROBE Initiative is available at [www.strobe-statement.org](http://www.strobe-statement.org).

# BMJ Open

## Willingness to seek medical care for tuberculosis and associated factors among the elderly population in Shenzhen: A cross-sectional study

|                                 |                                                                                                                                                                                                                                                                                                                                                                                                                                                                                                                                                                                                                                                                                                                                                                                                                                                                                                                                                                                            |
|---------------------------------|--------------------------------------------------------------------------------------------------------------------------------------------------------------------------------------------------------------------------------------------------------------------------------------------------------------------------------------------------------------------------------------------------------------------------------------------------------------------------------------------------------------------------------------------------------------------------------------------------------------------------------------------------------------------------------------------------------------------------------------------------------------------------------------------------------------------------------------------------------------------------------------------------------------------------------------------------------------------------------------------|
| Journal:                        | <i>BMJ Open</i>                                                                                                                                                                                                                                                                                                                                                                                                                                                                                                                                                                                                                                                                                                                                                                                                                                                                                                                                                                            |
| Manuscript ID                   | bmjopen-2021-051291.R2                                                                                                                                                                                                                                                                                                                                                                                                                                                                                                                                                                                                                                                                                                                                                                                                                                                                                                                                                                     |
| Article Type:                   | Original research                                                                                                                                                                                                                                                                                                                                                                                                                                                                                                                                                                                                                                                                                                                                                                                                                                                                                                                                                                          |
| Date Submitted by the Author:   | 04-Sep-2021                                                                                                                                                                                                                                                                                                                                                                                                                                                                                                                                                                                                                                                                                                                                                                                                                                                                                                                                                                                |
| Complete List of Authors:       | Wang, Yunxia; Shenzhen Bao'an Centre for Chronic Disease Control<br>Feng, Jing; Huazhong University of Science and Technology<br>Zhang, Juanjuan; Shenzhen Bao'an Centre for Chronic Disease Control<br>Shen, Xin; Huazhong University of Science and Technology<br>Lei, Zihui; Huazhong University of Science and Technology Tongji Medical College<br>Zhu, Yi; Huazhong University of Science and Technology<br>Meng, Xin; Huazhong University of Science and Technology<br>Di, Hongkun; Huazhong University of Science and Technology<br>Xia, Wenqi; Huazhong University of Science and Technology<br>Lu, Zuxun; Huazhong University of Science and Technology Tongji Medical College, Department of Social Medicine and Health Management<br>Guo, Yanfang; Shenzhen Bao'an Centre for Chronic Disease Control<br>Yuan, Qing; Shenzhen Bao'an Centre for Chronic Disease Control<br>Wang, Xiaojun; Wuhan Pulmonary Hospital<br>Gan, Yong; Huazhong University of Science and Technology |
| <b>Primary Subject Heading</b>: | Infectious diseases                                                                                                                                                                                                                                                                                                                                                                                                                                                                                                                                                                                                                                                                                                                                                                                                                                                                                                                                                                        |
| Secondary Subject Heading:      | Public health                                                                                                                                                                                                                                                                                                                                                                                                                                                                                                                                                                                                                                                                                                                                                                                                                                                                                                                                                                              |
| Keywords:                       | Tuberculosis < INFECTIOUS DISEASES, Public health < INFECTIOUS DISEASES, Infection control < INFECTIOUS DISEASES                                                                                                                                                                                                                                                                                                                                                                                                                                                                                                                                                                                                                                                                                                                                                                                                                                                                           |
|                                 |                                                                                                                                                                                                                                                                                                                                                                                                                                                                                                                                                                                                                                                                                                                                                                                                                                                                                                                                                                                            |

SCHOLARONE™  
Manuscripts



I, the Submitting Author has the right to grant and does grant on behalf of all authors of the Work (as defined in the below author licence), an exclusive licence and/or a non-exclusive licence for contributions from authors who are: i) UK Crown employees; ii) where BMJ has agreed a CC-BY licence shall apply, and/or iii) in accordance with the terms applicable for US Federal Government officers or employees acting as part of their official duties; on a worldwide, perpetual, irrevocable, royalty-free basis to BMJ Publishing Group Ltd ("BMJ") its licensees and where the relevant Journal is co-owned by BMJ to the co-owners of the Journal, to publish the Work in this journal and any other BMJ products and to exploit all rights, as set out in our [licence](#).

The Submitting Author accepts and understands that any supply made under these terms is made by BMJ to the Submitting Author unless you are acting as an employee on behalf of your employer or a postgraduate student of an affiliated institution which is paying any applicable article publishing charge ("APC") for Open Access articles. Where the Submitting Author wishes to make the Work available on an Open Access basis (and intends to pay the relevant APC), the terms of reuse of such Open Access shall be governed by a Creative Commons licence – details of these licences and which [Creative Commons](#) licence will apply to this Work are set out in our licence referred to above.

Other than as permitted in any relevant BMJ Author's Self Archiving Policies, I confirm this Work has not been accepted for publication elsewhere, is not being considered for publication elsewhere and does not duplicate material already published. I confirm all authors consent to publication of this Work and authorise the granting of this licence.



1  
2  
3  
4 **Willingness to seek medical care for tuberculosis and associated factors among the**  
5  
6 **elderly population in Shenzhen: A cross-sectional study**  
7  
8  
9

10 Yunxia Wang, PhD<sup>1†</sup>, Jing Feng, MPH<sup>2†</sup>, Juanjuan Zhang, MS<sup>1</sup>, Xin Shen, MPH<sup>2</sup>, Zihui Lei,  
11 MPH<sup>2</sup>, Yi Zhu, MS<sup>2</sup>, Xin Meng, MS<sup>2</sup>, Hongkun Di, MS<sup>2</sup>, Wenqi Xia, MS<sup>2</sup>, Zuxun Lu, PhD<sup>2</sup>,  
12 MPH<sup>2</sup>, Yi Zhu, MS<sup>2</sup>, Xin Meng, MS<sup>2</sup>, Hongkun Di, MS<sup>2</sup>, Wenqi Xia, MS<sup>2</sup>, Zuxun Lu, PhD<sup>2</sup>,  
13 MPH<sup>2</sup>, Yi Zhu, MS<sup>2</sup>, Xin Meng, MS<sup>2</sup>, Hongkun Di, MS<sup>2</sup>, Wenqi Xia, MS<sup>2</sup>, Zuxun Lu, PhD<sup>2</sup>,  
14 MPH<sup>2</sup>, Yi Zhu, MS<sup>2</sup>, Xin Meng, MS<sup>2</sup>, Hongkun Di, MS<sup>2</sup>, Wenqi Xia, MS<sup>2</sup>, Zuxun Lu, PhD<sup>2</sup>,  
15 MPH<sup>2</sup>, Yi Zhu, MS<sup>2</sup>, Xin Meng, MS<sup>2</sup>, Hongkun Di, MS<sup>2</sup>, Wenqi Xia, MS<sup>2</sup>, Zuxun Lu, PhD<sup>2</sup>,  
16 Yanfang Guo, MS<sup>1</sup>, Qing Yuan, MPH<sup>1</sup>, Xiaojun Wang, PhD<sup>3\*</sup>, Yong Gan, PhD<sup>2\*</sup>  
17  
18  
19  
20

21 **†These authors contributed equally to this work.**  
22  
23  
24

25 **Authors' affiliations:** <sup>1</sup>Shenzhen Bao'an Centre for Chronic Disease Control, Shenzhen,  
26 Guangdong, China; <sup>2</sup>Department of Social Medicine and Health Management, School of  
27 Public Health, Tongji Medical College, Huazhong University of Science and Technology,  
28 Wuhan, Hubei, China; <sup>3</sup>Wuhan Institute for Tuberculosis Control, Wuhan Pulmonary  
29 Hospital, Wuhan, Hubei, China  
30  
31  
32  
33  
34  
35  
36  
37  
38

39 **\*Correspondence to:** Dr. Yong Gan, Department of Social Medicine and Health  
40 Management, School of Public Health, Tongji Medical College, Huazhong University of  
41 Science and Technology, No. 13 Hangkong Road, Wuhan 430030, China; Telephone and fax  
42 numbers: +86-27-83692396; E-mail: scswj2008@163.com or Dr. Xiaojun Wang, Wuhan  
43 Institute for Tuberculosis Control, Wuhan Pulmonary Hospital, No. 28 Baofeng Road, Wuhan  
44 430030, China; Telephone and fax numbers: +86-27-83602313; E-mail:  
45 wangxiaojun\_cn@163.com  
46  
47  
48  
49  
50  
51  
52  
53  
54  
55  
56  
57  
58  
59  
60

## Abstract

**Objectives** This study was aimed to assess the willingness of elderly people to seek medical care for tuberculosis (TB) and the associated influencing factors.

**Design** A cross-sectional study.

**Setting** A multistage random survey was conducted in Bao'an District of Shenzhen in China.

**Participants** A total of 1,200 elderly people aged 65 or above were recruited for the study and completed a structured questionnaire between September and October 2019.

**Main outcome measures** Descriptive and binary logistic stepwise regression analyses were conducted to analyse the characteristics of elderly individuals, their willingness to seek medical care for TB and associated factors.

**Results** Among the final 1,123 respondents, 943 (84.0%) were willing to seek medical care if they discovered suspicious TB symptoms. Binary logistic stepwise regression analysis indicated that respondents whose family annual income per capita was 50,000–100,000 ¥ [odds ratio (OR) = 2.56, 95% confidence interval (CI): 1.44–4.54,  $P < 0.01$ ] and who had positive attitudes ( $\geq 3$  scores: OR = 3.10, 95% CI: 1.90–5.05,  $P < 0.01$ ) or practices ( $\geq 4$  scores: OR = 3.13, 95% CI: 1.82–5.39,  $P < 0.01$ ) towards TB were more willing to seek medical care for TB.

**Conclusions** Willingness to seek medical care for TB in the elderly population can be improved according to the determinants.

### Strengths and limitations of this study

- This is the first study to investigate willingness to seek medical care for tuberculosis (TB) among elderly individuals in China.
- The logistic regression model provides quantified results of the influencing factors of willingness to seek medical care for TB among elderly individuals, which could provide a reference for TB control policies.
- There may be more potential influencing factors of willingness to seek medical care for TB than those we investigated in the study.
- The cross-sectional study design is limited in terms of identifying the causality of the observed relationships.

## Introduction

Tuberculosis (TB) is a major cause of ill health, one of the top 10 causes of death worldwide, and the leading cause of death from a single infectious agent. In 2019, an estimated 10 million people worldwide fell ill with TB, and 1.4 million died.<sup>1</sup> The risk of TB increases with age, and the pace of population ageing is increasing in modern China. World Health Organization (WHO) has estimated that there will be 402 million people aged 60 or above in China by 2040.<sup>2</sup> The Fifth National TB Epidemiological Survey revealed that 48.8% of TB patients were over 60 years old, while the prevalence of active TB in the elderly population over 65 years old was determined to be 1,270/100,000.<sup>3</sup> According to the Chinese Centre for Disease Control and Prevention, a total of 775,764 cases of TB were reported in the National Notifiable Disease Reporting System (NNDRS) in 2019.<sup>4</sup> The reporting rate of TB cases increased with age, with 197,730 (25.5%) cases among people aged 65 or older.<sup>4</sup> Elderly people are one of the bottlenecks in TB control in China, and more TB preventive measures are urgently needed to reach the most vulnerable populations.

Currently, the "trinity" model of TB prevention and treatment in China comprises the Centre for Disease Control and Prevention, designated TB diagnostic and treatment hospitals, and primary healthcare institutions.<sup>5</sup> This model plays an important role in TB control and has made some progress. However, the rate of delay in TB diagnosis and treatment has remained high among the elderly,<sup>6-8</sup> which is a major contributor to poor outcomes and TB transmission. The willingness to seek medical care of elderly people with possible symptoms could predict the actual behaviour of seeking care in TB prevention and treatment institutions. In addition, positive behaviour related to TB could not only improve the detection rate for the disease but also reduce the proportion of delayed diagnosis and treatment.<sup>9</sup> Therefore, this study aimed to examine willingness to seek medical care for TB and its determinants among

1  
2  
3  
4 elderly people aged 65 or older. The findings may provide references for TB prevention and  
5  
6 control among the elderly.  
7  
8  
9

## 10 **Methods**

### 11 **Study setting**

12  
13 Shenzhen, a highly developed region in China, had an estimated population of more than 13.4  
14  
15 million in 2019.<sup>10</sup> The percentage of the migrant population was 63.2% in Shenzhen  
16  
17 compared to 80.5% in Bao'an District.<sup>10</sup> The immigrants were mostly poor, had a low level of  
18  
19 education, and lived in circumstances conducive to TB transmission.<sup>11,12</sup> Although the  
20  
21 incidence of TB has declined in Shenzhen, the prevalence of TB has remained high in Bao'an  
22  
23 District due to a high TB case load caused by a heavy concentration of migrants.  
24  
25  
26  
27  
28

29  
30 The Chinese government launched the directly observed treatment + short course  
31  
32 chemotherapy (DOTS) strategy to control the TB epidemic in 1990 and has followed this  
33  
34 protocol since then.<sup>13</sup> Shenzhen was one of the first cities in China to implement the DOTS  
35  
36 strategy in 1993, and its coverage at the individual level reached 100% in 2000.<sup>14</sup> Economy  
37  
38 and social progress developed rapidly in Shenzhen, which was the first established special  
39  
40 economic zone in China. The region has a robust health care infrastructure, providers, service  
41  
42 culture, and conditions for timely diagnosis and treatment.<sup>9,12</sup> The Centre for Chronic Disease  
43  
44 Control, the local institution designated for TB management, provides TB diagnosis,  
45  
46 treatment, and management. Patients have free access to anti-TB fix-dose combination  
47  
48 products and must undergo standard anti-TB treatment.<sup>15</sup> After patients start to take anti-TB  
49  
50 drugs, they are required to visit the Centre for Chronic Disease Control every month for  
51  
52 health checks until the treatment ends.<sup>11</sup> In addition to free TB drugs, the government  
53  
54 provides subsidies for transportation and nutrition for low-income TB patients.<sup>16</sup> However, all  
55  
56  
57  
58  
59  
60

1  
2  
3  
4 patients must pay for monthly prescriptions for subsidiary drugs such as liver protection drugs,  
5  
6 and auxiliary examinations, such as X-ray tests.<sup>11,17</sup>  
7  
8  
9

### 10 **Study population and sampling**

11  
12 This study was conducted between September and October 2019 in Bao'an District of  
13  
14 Shenzhen. With a confidence interval (CI) of 95%, an estimated proportion of 92.2%,<sup>18</sup> and  
15  
16 an absolute error of 5%, the sample size was rounded to 113 according to the formula,  $n =$   
17  
18  $[Z^2p(1-p)]/d^2$ . To compensate for nonresponses, the sample size was increased by 10% to  
19  
20  
21  
22 124.

23  
24 A multistage random sampling method was performed in the study. First, 2 of 8  
25  
26 community health service centres with chest X-ray film screening capabilities in Bao'an  
27  
28 District were selected randomly. Second, 600 people aged 65 or above who received health  
29  
30 examinations were randomly selected from every community health service centre. Elderly  
31  
32 people in the study communities were included in the survey if they: (1) were aged 65 or  
33  
34 older, (2) had resided in the area for at least half a year, (3) had no communication disorders  
35  
36 or mental illnesses, and (4) were willing to complete the survey. Respondents were excluded  
37  
38 if they did not meet any of the above requirements.  
39  
40  
41  
42  
43  
44

### 45 **Patient and public involvement**

46  
47 No patients were involved in this study.  
48  
49  
50

### 51 **Study design and instrument**

52  
53 A cross-sectional study was used to collect data from the elderly population through  
54  
55 face-to-face interviews with a structured questionnaire. Based on the actual conditions of  
56  
57 elderly people in Shenzhen and the context of health care in China, we designed a  
58  
59  
60

1  
2  
3  
4 questionnaire according to previous literature.<sup>18-21</sup> The questionnaire contained four sections:  
5  
6 (1) demographic characteristics, such as gender, age, residence, duration of residence in  
7  
8 Shenzhen, education level, marital status, medical insurance, and family annual income per  
9  
10 capita; (2) health-related characteristics, including self-perceived health status, smoking and  
11  
12 alcohol consumption habits, and previous history of TB; (3) knowledge, attitudes, and  
13  
14 practices (KAP) for TB prevention and control;<sup>22</sup> and (4) willingness to seek medical care for  
15  
16 TB and specific reasons for being unwilling to seek medical care for TB (Appendix). In the  
17  
18 TB KAP section, incorrect, inappropriate, or uncertain (do not know) responses received a 0  
19  
20 score, while 1 point was assigned if the respondent chose the correct or appropriate answer;  
21  
22 correctness or appropriateness was based on current literature and best practices. The  
23  
24 respondents who answered 60% of the KAP questions correctly or appropriately were  
25  
26 considered aware of TB or to have positive attitudes or practices regarding TB.  
27  
28  
29  
30  
31  
32

### 33 **Data collection and quality control**

34  
35 The questionnaire was designed based on literature review, group discussions, and mock  
36  
37 interviews. A pilot study of 40 elderly people was conducted at one of the community health  
38  
39 service centres in the Bao'an District of Shenzhen to improve the quality of the questionnaire.  
40  
41 A total of 38 of those respondents were able to clearly understand all the questions of the  
42  
43 questionnaire, and further modifications were made according to their feedback. The  
44  
45 questionnaire had good validity among elderly people. The data were collected by trained  
46  
47 investigators through a field questionnaire survey. A logic check of all data was undertaken to  
48  
49 determine whether there were any contradictions. Logical errors were identified as certain  
50  
51 mismatched sociodemographic characteristics; for example, an individual aged 70 years old  
52  
53 reported a duration of residence in Shenzhen of more than 70 years.  
54  
55  
56  
57  
58  
59  
60

## Statistical analysis

All statistical procedures were performed using SPSS V.22.0 software. The descriptive statistics are presented as the number of observations in percentages (%).  $\chi^2$  tests were conducted to compare the willingness of the elderly to seek medical care for TB between groups. A binary stepwise logistic regression model was used to analyse the factors associated with willingness to seek medical care for TB among the elderly (levels for selection and elimination  $P = 0.05$  and  $P = 0.10$ , respectively), including a neutral attitude or unwillingness as the reference category. In the binary model, independent variables were age (65~70, 71~75, > 75), gender (male, female), residence (local residents, others), education (primary school or below, junior or senior middle school, college degree or above), marital status (married, unmarried/widowed/divorced), medical insurance (yes, no), family annual income per capita (< 50,000 ¥, 50,000~100,000 ¥, 100,000~200,000 ¥, > 200,000 ¥), self-perceived health status (good, fair, bad), smoking status (current smoker, former smoker, never smoked), alcohol intake (current drinker, former drinker, never drank), TB knowledge scores (< 3,  $\geq$  3), TB attitudes (< 3,  $\geq$  3), and TB practices (< 4,  $\geq$  4). The odds ratio (OR) and 95% CI for each variable were calculated. All tests were two-sided with a significance level of 0.05.

## Results

Initially, 1,200 elderly people were recruited for the survey, of whom 11 (0.92%) refused to participate. Based on the inclusion and exclusion criteria, 1,172 participants were ultimately included in the analyses. Because a previous history of TB might have influenced willingness to seek medical care for TB, we further excluded 35 participants who had previously been treated for TB. Then, we deleted 8 questionnaires due to missing data on willingness to seek medical care for TB. Additionally, we discarded 6 questionnaires with logical errors. Finally, 1,123 eligible questionnaires remained for analysis.



1  
2  
3  
4 The characteristics of the participants are reported in Table 1. Among 1,123 participants  
5 (response rate, 94.45%), 505 (45.3%) were males and 584 (52.5%) were aged 65~70 years.  
6  
7  
8 More than half (55.4%) had an educational level of primary school or below. The majority  
9  
10 (78.8%) held non-Shenzhen household registrations, and 947 (89.0%) were married. Most  
11  
12 (73.3%) of the participants had medical insurance. Of the respondents, 398 (37.8%) had a  
13  
14 family annual income per capita lower than 50,000 ¥. Less than half (48.1%) reported having  
15  
16 a good self-perceived health status. Only 119 (10.7%) and 106 (9.5%) were current cigarette  
17  
18 smokers and alcohol drinkers, respectively. The knowledge awareness rate for TB among  
19  
20 them was 69.1%. The percentages of respondents who had positive attitudes or practices were  
21  
22 48.0% and 42.2%, respectively.  
23  
24  
25

26  
27 A total of 943 (84.0%) respondents would choose to seek medical care if they exhibited  
28  
29 possible TB symptoms, whereas 155 (13.8%) were unwilling to seek treatment. Additionally,  
30  
31 when we investigated the reasons for unwillingness to seek medical care for TB, 82 (52.9%)  
32  
33 reported "long treatment cycle and heavy financial burden" as the main reason (Table 2).  
34  
35

36 Table 3 demonstrates the results of a comparison of willingness to seek medical care for  
37  
38 TB among various groups. There were significant differences in willingness to seek medical  
39  
40 care for TB across scores for TB KAP ( $P < 0.05$ ). There were no significant differences in  
41  
42 willingness to seek medical care for TB across genders, ages, residences, education levels,  
43  
44 marital statuses, medical insurance statuses, family annual income per capita levels,  
45  
46 self-perceived health statuses, tobacco use, or alcohol consumption ( $P > 0.05$ ).  
47  
48  
49

50 Table 4 shows the results of the binary logistic regression analysis to determine factors  
51  
52 associated with willingness to seek medical care for TB among the elderly. Family annual  
53  
54 income per capita (50,000~100,000 ¥: OR = 2.56, 95% CI: 1.44–4.54), attitudes towards TB  
55  
56 ( $\geq 3$ : OR = 3.10, 95% CI: 1.90–5.05) and practices towards TB ( $\geq 4$ : OR = 3.13, 95% CI:  
57  
58  
59  
60

1  
2  
3  
4 1.82–5.39) were significant predictors of the respondents' willingness to seek medical care for  
5  
6 TB.

## 10 **Discussion**

13 This was the first study to investigate the willingness of elderly individuals to seek medical  
14 care for TB in China. We found that 84.0% of the participants were willing to seek medical  
15 care for TB, while 13.8% were unwilling to seek medical care for TB. Individuals with  
16 possible TB symptoms who do not seek medical care will miss the opportunity for early  
17 detection of TB, leading to delayed treatment and poor prognoses.<sup>23-25</sup> In addition,  
18 unwillingness to seek medical care may increase the potential risk of transmission and will  
19 have a negative impact on their families and society.<sup>26</sup>

29 Our findings showed that the main reason for being unwilling to seek medical care for TB  
30 was "long treatment cycle and heavy economic burden". This indicated that individuals'  
31 economic situation impacts their willingness to seek treatment. In China, the policy that TB  
32 diagnosis and anti-TB drugs are free is not well understood, and some even doubt its  
33 authenticity.<sup>27,28</sup> In addition, the free items provided by the government accounted for less  
34 than 40% of the total cost of TB diagnosis and treatment, meaning that TB patients still must  
35 pay more than half of the total cost.<sup>29</sup> This may explain the effects of economic situation on  
36 willingness to seek medical care for TB. Similarly, the economic burden has been found to be  
37 a key factor hindering health-seeking behaviours among TB patients, as well as a primary  
38 concern for TB control in India,<sup>23</sup> Indonesia,<sup>30</sup> Malawi,<sup>31</sup> the Middle East, and North Africa.<sup>32</sup>  
39 To reduce the economic burden on TB patients, it is important for the government to expand  
40 health insurance coverage and lower the costs of TB treatment. The economic factor was  
41 further supported by the multivariate analysis result that family annual income per capita  
42 affected the willingness of the elderly to seek treatment. However, the significant association

1  
2  
3  
4 between family annual income per capita and willingness to seek medical care appeared only  
5  
6 in the respondents who had 50,000~100,000 ¥ of family annual income per capita. The  
7  
8 percentage of respondents whose family annual income per capita was more than 100,000 ¥  
9  
10 was relatively low in our study. Income is a sensitive topic and elderly people may  
11  
12 underreport it. Thus, the effects of high family annual income per capita on willingness to  
13  
14 seek medical care may have been underestimated in this study.  
15  
16

17  
18 Many participants worried about being discriminated against for visiting TB prevention  
19  
20 and treatment institutions, which was another important factor hindering their willingness to  
21  
22 seek treatment. This was consistent with previous findings in South Africa,<sup>33</sup> Ethiopia,<sup>34</sup> India,  
23  
24 Bangladesh, Malawi, and Columbia.<sup>35</sup> Previous studies have shown that TB patients suffer  
25  
26 from widespread discriminatory and differential treatment due to long-term stereotypes about  
27  
28 TB.<sup>33,36</sup> The fear of being discriminated against can affect elderly people's willingness to seek  
29  
30 medical care, health-seeking behaviours, and compliance during the treatment process.<sup>9,33,37</sup> In  
31  
32 addition, evidence has shown that TB stigma was associated with patient delay and diagnostic  
33  
34 delay.<sup>9</sup> Available evidence suggests that measures aimed at empowering TB patients to resist  
35  
36 stigmatizing perceptions, as well as efforts to change norms related to TB, can be effective in  
37  
38 reducing the stigma associated with TB.<sup>38</sup> To increase the willingness of the elderly  
39  
40 population to seek medical care and enable them to receive timely treatment, it is crucial to  
41  
42 further popularize knowledge about TB and eliminate the denigration and stigmatization of  
43  
44 TB through a variety of effective educational methods.  
45  
46  
47  
48

49  
50 The results of the multivariate analysis showed that higher scores on attitudes and  
51  
52 behaviours related to TB prevention and control were associated with greater willingness to  
53  
54 seek medical care for TB. However, the prevalence of positive attitudes and practices towards  
55  
56 TB was low. Therefore, measures should be taken to improve TB-related attitudes and  
57  
58 behaviours among the elderly, which may help to increase willingness to seek medical care  
59  
60

1  
2  
3  
4 for TB. Intriguingly, we found that TB knowledge scores were not a significant determinant  
5  
6 of willingness to seek medical care in the multivariate analysis, which was not in line with  
7  
8 previous studies.<sup>9,25,26,32,39</sup> Therefore, the association between TB knowledge and willingness  
9  
10 to seek medical care needs further research.

11  
12  
13 This study had several strengths. First, it was the first to investigate the willingness of the  
14  
15 elderly to seek medical care for TB in China. Second, our research found that certain  
16  
17 important factors were associated with willingness to seek medical care, which could provide  
18  
19 a reference for TB control policies among elderly people. However, some limitations should  
20  
21 be noted. First, there may be more potential influencing factors of willingness to seek medical  
22  
23 care than those we investigated in the study. Second, we listed "others" as an open-ended  
24  
25 response to reasons for unwillingness to seek medical care for TB but failed to acquire  
26  
27 information about the specific other reasons, as the respondents did not provide detailed  
28  
29 answers to this question. In future research, we could consider designing specific responses to  
30  
31 investigate elderly people's additional reasons for being unwilling to seek medical care for  
32  
33 TB. Third, the study was cross-sectional, and thus was limited in terms of identifying the  
34  
35 causality of the observed relationships. Fourth, this study enrolled only elderly people in  
36  
37 Shenzhen, limiting the generalizability of the findings to other geographical regions.  
38  
39  
40  
41  
42  
43  
44

## 45 **Conclusion**

46  
47 In summary, this study found that family annual income per capita and TB-related attitudes  
48  
49 and practices were significant predictors of willingness to seek medical care for TB among  
50  
51 the elderly population. It is necessary to publicize TB-related knowledge and policies among  
52  
53 the elderly. Measures must be taken to reduce the economic burden, clarify social  
54  
55 misconceptions about TB and eliminate discrimination against TB patients.  
56  
57  
58  
59  
60

## Declarations

## Acknowledgements

We thank the elderly population who participated in this research.

## Contributors

YXW, JF, and YG conceived and designed the study. JF, JJZ, XS, YZ, XM, HKD, YFG, QY, and WQX participated in the acquisition of data. YXW and XS analyzed the data. ZHL, ZXL, XJW, and YG gave advice on methodology. YXW and JF wrote the draft of the paper. All authors contributed to writing, reviewing, or revising the paper and read and approved the final manuscript. YG is the guarantor of this work and has full access to all the data in the study and takes responsibility for its integrity and the accuracy of the data analysis.

## Funding

This work was supported by National Science and Technology Major Project of the Ministry of Science and Technology of China (2018ZX10715004), Natural Science Foundation of Hubei Province (2020CFB218), Health Commission of Hubei Province Scientific Research Project (WJ2019H400), Scientific Research Fund of Wuhan Municipal Health Commission (WG19Q03), and A Major Infectious Disease Prevention and Control of the National Science and Technique Major Project (2018ZX10715004).

## Competing interests

We declare that we have no conflict of interests.

## Patient consent for publication

Not required.

**Ethics approval**

The study was approved by the Ethics Committee of the Tongji Medical College Institutional Review Board, Huazhong University of Science and Technology, Wuhan, China. Informed consent was obtained from all survey participants.

**Data sharing statement**

Data may be made available by contacting the corresponding author.

**Word count**

2715 words

## References

1. World Health Organization. *Global tuberculosis report 2020*. Geneva: World Health Organization, 2020. <https://www.who.int/publications/i/item/9789240013131>
2. World Health Organization. *China country assessment report on ageing and health*. Geneva: World Health Organization, 2015. <https://www.who.int/ageing/publications/china-country-assessment/zh/>
3. Wang Y. Data compilation of the fifth national tuberculosis epidemiological sampling survey in China. *Beijing: Military Medical Science Press* 2011.
4. Chen W, Zhang H, Du X, et al. Characteristics and Morbidity of the Tuberculosis Epidemic — China, 2019. *China CDC Weekly* 2020;2(12):181-4.
5. General Office of the State Council of the People's Republic of China. National Tuberculosis Prevention and Control Plan (2011-2015). [http://www.gov.cn/zhengce/content/2011-12/06/content\\_6143.htm](http://www.gov.cn/zhengce/content/2011-12/06/content_6143.htm). Accessed 15 Dec 2020
6. Li Y, Wang Z, Geng H. Current status and influencing factors of delayed visits to elderly pulmonary tuberculosis patients in Shandong Province. *Chin J Gerontology* 2013;33(05):1125-7.
7. Yang J, Du Y, Zhao Y, et al. Patient delay and the impact factors for senile pulmonary tuberculosis in rural area. *Chin Rural Health Serv Admin* 2010;30(04):300-2.
8. Shen H, Du Y, Zhang G, et al. Influencing factors of pulmonary tuberculosis patient delay in Guangzhou, 2008-2018. *Chin J Antituberc* 2020;42(05):510-7.
9. Li Y, Ehiri J, Tang S, et al. Factors associated with patient, and diagnostic delays in Chinese TB patients: a systematic review and meta-analysis. *BMC Med* 2013;11:156.
10. Shenzhen Bureau of Statistics, Shenzhen Investigation Team of National Bureau of Statistics. Shenzhen Statistical Yearbook 2020. *Beijing: China Statistics Press* 2020.

- 1  
2  
3  
4 11. Huang Y, Huang J, Su X, et al. Analysis of the economic burden of diagnosis and  
5  
6 treatment on patients with tuberculosis in Bao'an district of Shenzhen City, China.  
7  
8 *PLoS One* 2020;15(8):e0237865.  
9
- 10  
11 12. Xu X, Liu J, Cao S, et al. Delays in care seeking, diagnosis and treatment among  
12  
13 pulmonary tuberculosis patients in Shenzhen, China. *Int J Tuberc Lung Dis*  
14  
15 2013;17(5):615-20.  
16
- 17  
18 13. China Tuberculosis Control Collaboration. The effect of tuberculosis control in China.  
19  
20 *Lancet* 2004;364(9432):417-22.  
21
- 22  
23 14. Zhu L, Yang Y, Guan H, et al. Trends in drug-resistant tuberculosis after the  
24  
25 implementation of the DOTS strategy in Shenzhen, China, 2000-2013. *Int J Tuberc*  
26  
27 *Lung Dis* 2017;21(7):759-65.  
28
- 29  
30 15. Tang Y, Zhao M, Wang Y, et al. Non-adherence to anti-tuberculosis treatment among  
31  
32 internal migrants with pulmonary tuberculosis in Shenzhen, China: a cross-sectional  
33  
34 study. *BMC Public Health* 2015;15:474.  
35
- 36  
37 16. Lu H, Yan F, Wang W, et al. Do transportation subsidies and living allowances  
38  
39 improve tuberculosis control outcomes among internal migrants in urban Shanghai,  
40  
41 China? *Western Pac Surveill Response J* 2013;4(1):19-24.  
42
- 43  
44 17. Liu Q, Smith H, Wang Y, et al. Tuberculosis patient expenditure on drugs and tests in  
45  
46 subsidised, public services in China: a descriptive study. *Trop Med Int Health*  
47  
48 2010;15(1):26-32.  
49
- 50  
51 18. Zhao M, Wang W, Tang Y, et al. Survey on knowledge, attitude and practice about  
52  
53 tuberculosis prevention and treatment among residents in Bao'an District of Shenzhen.  
54  
55 *J Clin Pulm Med* 2015;20(09):1567-71.  
56
- 57  
58 19. National Health and Family Planning Commission of the People's Republic of China.  
59  
60 Notice of the National Health and Family Planning Commission of the People's



1  
2  
3  
4 Republic of China on the issuance of the work plan for the dissemination of  
5  
6 knowledge on tuberculosis prevention and control by millions of volunteers and the  
7  
8 core information and knowledge points on tuberculosis prevention and control.  
9  
10 <http://www.nhc.gov.cn/jkj/s3589/201604/2dd6a74584d34a6ba0dd863544e83416.shtml>

11  
12  
13 I. Accessed 10 July 2021

- 14  
15 20. Ma J. Study on the elderly pulmonary tuberculosis epidemic characteristic in  
16  
17 Dongchuan district and awareness of tuberculosis prevention and control knowledge.  
18  
19 Kunming: Kunming Medical University 2015.
- 20  
21 21. Lu C, Che X, Li M, et al. Investigation on public awareness in key information of  
22  
23 tuberculosis prevention and control in Shenzhen. *J Tuberc Lung Health*  
24  
25 2019;8(4):259-64.
- 26  
27 22. Wang Y, Gan Y, Zhang J, et al. Analysis of the current status and associated factors of  
28  
29 tuberculosis knowledge, attitudes, and practices among elderly people in Shenzhen: a  
30  
31 cross-sectional study. *BMC Public Health* 2021;21(1):1163.
- 32  
33 23. Thomas BE, Thiruvengadam K, S R, et al. Understanding health care-seeking  
34  
35 behaviour of the tribal population in India among those with presumptive TB  
36  
37 symptoms. *PLoS One* 2021;16(5):e0250971.
- 38  
39 24. Helfinstein S, Engl E, Thomas BE, et al. Understanding why at-risk population  
40  
41 segments do not seek care for tuberculosis: a precision public health approach in  
42  
43 South India. *BMJ Glob Health* 2020;5(9):e002555.
- 44  
45 25. Tong Y, Guan X, Hou S, et al. Determinants of Health Care-Seeking Delay among  
46  
47 Tuberculosis Patients in Rural Area of Central China. *Int J Environ Res Public Health*  
48  
49 2018;15(9):1998.
- 50  
51  
52  
53  
54  
55  
56  
57  
58  
59  
60

- 1
- 2
- 3
- 4 26. Obsa MS, Daga WB, Wosene NG, et al. Treatment seeking delay and associated
- 5 factors among tuberculosis patients attending health facility in Ethiopia from 2000 to
- 6 2020: A systematic review and meta analysis. *PLoS One* 2021;16(7):e0253746.
- 7
- 8
- 9
- 10 27. Chen X, Wang W, Wang X, et al. Public Awareness of Tuberculosis in Southeast
- 11 China: A Population-Based Study. *Int J Environ Res Public Health* 2019;16(21):4290.
- 12
- 13
- 14
- 15 28. Wang J, Fei Y, Shen H, et al. Gender difference in knowledge of tuberculosis and
- 16 associated health-care seeking behaviors: a cross-sectional study in a rural area of
- 17 China. *BMC Public Health* 2008;8:354.
- 18
- 19
- 20 29. Li Y, Li X, Xie HB, et al. Analysis on the reimbursement situation of TB treatment
- 21 costs in the new rural cooperative medical system. *Chin J Antituberc*
- 22 2010;32(11):685-9.
- 23
- 24
- 25
- 26
- 27
- 28
- 29 30. Rintiswati N, Mahendradhata Y, Suharna, et al. Journeys to tuberculosis treatment: a
- 30 qualitative study of patients, families and communities in Jogjakarta, Indonesia. *BMC*
- 31 *Public Health* 2009;9:158.
- 32
- 33
- 34
- 35
- 36 31. Meghji J, Gregorius S, Madan J, et al. The long term effect of pulmonary tuberculosis
- 37 on income and employment in a low income, urban setting. *Thorax*
- 38 2021;76(4):387-95.
- 39
- 40
- 41
- 42 32. Eltayeb D, Pietersen E, Engel M, et al. Factors associated with tuberculosis diagnosis
- 43 and treatment delays in Middle East and North Africa: a systematic review. *East*
- 44 *Mediterr Health J* 2020;26(4):477-86.
- 45
- 46
- 47
- 48
- 49 33. Cramm JM, Finkenflügel HJ, Møller V, et al. TB treatment initiation and adherence in
- 50 a South African community influenced more by perceptions than by knowledge of
- 51 tuberculosis. *BMC Public Health* 2010;10:72.
- 52
- 53
- 54
- 55
- 56 34. Datiko DG, Jerene D, Suarez P. Stigma matters in ending tuberculosis: Nationwide
- 57 survey of stigma in Ethiopia. *BMC Public Health* 2020;20(1):190.
- 58
- 59
- 60

- 1  
2  
3  
4 35. Somma D, Thomas BE, Karim F, et al. Gender and socio-cultural determinants of  
5  
6 TB-related stigma in Bangladesh, India, Malawi and Colombia. *Int J Tuberc Lung Dis*  
7  
8 2008;12(7):856-66.  
9
- 10 36. Mushtaq MU, Shahid U, Abdullah HM, et al. Urban-rural inequities in knowledge,  
11  
12 attitudes and practices regarding tuberculosis in two districts of Pakistan's Punjab  
13  
14 province. *Int J Equity Health* 2011;10:8.  
15  
16
- 17 37. Kane JC, Elafros MA, Murray SM, et al. A scoping review of health-related stigma  
18  
19 outcomes for high-burden diseases in low- and middle-income countries. *BMC Med*  
20  
21 2019;17(1):17.  
22  
23
- 24 38. Courtwright A, Turner AN. Tuberculosis and stigmatization: pathways and  
25  
26 interventions. *Public Health Rep* 2010;125 Suppl 4(Suppl 4):34-42.  
27  
28
- 29 39. Chibatata NBW, Zhou CM, Chibatata CM, et al. Post-2015, why delay to seek  
30  
31 healthcare? Perceptions and field experiences from TB healthcare providers in  
32  
33 northern Malawi: a qualitative study. *Infect Dis Poverty* 2017;6(1):60.  
34  
35  
36  
37  
38  
39  
40  
41  
42  
43  
44  
45  
46  
47  
48  
49  
50  
51  
52  
53  
54  
55  
56  
57  
58  
59  
60

**Table 1 Characteristics of the study population\***

| Variables                           | N    | %    |
|-------------------------------------|------|------|
| Total                               | 1123 | 100  |
| Age, y                              |      |      |
| 65~70                               | 584  | 52.5 |
| 71~75                               | 312  | 28   |
| >75                                 | 217  | 19.5 |
| Gender                              |      |      |
| Male                                | 505  | 45.3 |
| Female                              | 611  | 54.7 |
| Residence                           |      |      |
| Local residents                     | 232  | 21.2 |
| Others                              | 862  | 78.8 |
| Education level                     |      |      |
| Primary school or below             | 605  | 55.4 |
| Junior or senior middle school      | 423  | 38.7 |
| College degree or above             | 64   | 5.9  |
| Marital status                      |      |      |
| Married                             | 947  | 89   |
| Unmarried/widow/divorced            | 117  | 11   |
| Medical insurance                   |      |      |
| Yes                                 | 779  | 73.3 |
| No                                  | 284  | 26.7 |
| Family annual income per capita (¥) |      |      |
| < 50,000                            | 398  | 37.8 |
| 50,000~100,000                      | 342  | 32.4 |
| 100,000~200,000                     | 221  | 21   |
| > 200,000                           | 93   | 8.8  |
| Self-perceived health status        |      |      |
| Good                                | 505  | 48.1 |
| Fair                                | 476  | 45.3 |
| Bad                                 | 69   | 6.6  |
| Smoking status                      |      |      |
| Current smoker                      | 119  | 10.7 |
| Former smoker                       | 92   | 8.3  |
| Never smoker                        | 902  | 81   |
| Alcohol intake                      |      |      |
| Current Drinker                     | 106  | 9.5  |
| Former drinker                      | 82   | 7.3  |
| Never drinker                       | 931  | 83.2 |
| TB knowledge scores                 |      |      |
| < 3                                 | 333  | 30.9 |
| ≥ 3                                 | 746  | 69.1 |

|    |                     |     |      |
|----|---------------------|-----|------|
| 1  |                     |     |      |
| 2  |                     |     |      |
| 3  |                     |     |      |
| 4  | TB attitudes scores |     |      |
| 5  | < 3                 | 546 | 52   |
| 6  | ≥ 3                 | 505 | 48   |
| 7  |                     |     |      |
| 8  | TB practice scores  |     |      |
| 9  | < 4                 | 555 | 57.8 |
| 10 | ≥ 4                 | 406 | 42.2 |

11 \*Missing number of participants: age: 10; gender: 7; residence: 29; education level: 31; marital status:

12 59; medical insurance: 60; family annual income per capita: 69; self-perceived health status: 73;

13 smoking status: 10; alcohol consumption habits: 4; TB knowledge scores: 44; TB attitudes scores: 72;

14 TB practice scores: 162.

15 Abbreviation: TB, tuberculosis.

**Table 2 Distribution according to the reasons of unwillingness to seek medical care for TB among elderly population (N=155)**

| Items                                                                          | N  | %    |
|--------------------------------------------------------------------------------|----|------|
| Lack of trust in the medical level of TB prevention and treatment institutions | 40 | 25.8 |
| Poor attitude of medical staff                                                 | 8  | 5.2  |
| Long treatment time and heavy economic burden                                  | 82 | 52.9 |
| Fear of discrimination                                                         | 46 | 29.7 |
| Others                                                                         | 55 | 35.5 |

Abbreviation: TB, tuberculosis.

**Table 3 Factors associated with medical care-seeking willingness for tuberculosis among elderly population\* (N=1,123)**

| Variables                           | Willing    | Neutral   | Unwilling  | $\chi^2$ | <i>P</i> |
|-------------------------------------|------------|-----------|------------|----------|----------|
| Total                               | 943 (84.0) | 25 (2.2)  | 155 (13.8) |          |          |
| Age, y                              |            |           |            | 1.74     | 0.78     |
| 65~70                               | 490 (52.4) | 12 (48.0) | 82 (53.9)  |          |          |
| 71~75                               | 262 (28.0) | 6 (24.0)  | 44 (28.9)  |          |          |
| > 75                                | 184 (19.7) | 7 (28.0)  | 26 (17.1)  |          |          |
| Gender                              |            |           |            | 1.58     | 0.45     |
| Male                                | 430 (45.9) | 12 (48.0) | 63 (40.6)  |          |          |
| Female                              | 506 (54.1) | 13 (52.0) | 92 (59.4)  |          |          |
| Residence                           |            |           |            | 5.04     | 0.08     |
| Local residents                     | 185 (20.2) | 9 (36.0)  | 38 (24.8)  |          |          |
| Others                              | 731 (79.8) | 16 (64.0) | 115 (75.2) |          |          |
| Education level                     |            |           |            | 3.23     | 0.52     |
| Primary school or below             | 503 (54.9) | 13 (54.2) | 89 (58.9)  |          |          |
| Junior or senior middle school      | 363 (39.6) | 10 (41.7) | 50 (33.1)  |          |          |
| College degree or above             | 51 (5.6)   | 1 (4.2)   | 12 (7.9)   |          |          |
| Marital status                      |            |           |            | 0.39     | 0.82     |
| Married                             | 795 (89.1) | 22 (91.7) | 130 (87.8) |          |          |
| Unmarried/widow/divorced            | 97 (10.9)  | 2 (8.3)   | 18 (12.2)  |          |          |
| Medical insurance                   |            |           |            | 1.55     | 0.46     |
| Yes                                 | 657 (73.7) | 19 (79.2) | 103 (69.6) |          |          |
| No                                  | 234 (26.3) | 5 (20.8)  | 45 (30.4)  |          |          |
| Family annual income per capita (¥) |            |           |            | 9.39     | 0.15     |
| < 50,000                            | 337 (38.0) | 9 (39.1)  | 52 (36.1)  |          |          |
| 50,000~100,000                      | 300 (33.8) | 5 (21.7)  | 37 (25.7)  |          |          |
| 100,000~200,000                     | 173 (19.5) | 7 (30.4)  | 41 (28.5)  |          |          |
| > 200,000                           | 77 (8.7)   | 2 (8.7)   | 14 (9.7)   |          |          |
| Self-perceived health status        |            |           |            | 1.16     | 0.89     |
| Good                                | 420 (47.8) | 11 (50.0) | 74 (49.7)  |          |          |
| Fair                                | 403 (45.8) | 10 (45.5) | 63 (42.3)  |          |          |
| Bad                                 | 56 (6.4)   | 1 (4.5)   | 12 (8.1)   |          |          |
| Smoking status                      |            |           |            | 4.73     | 0.32     |
| Current smoker                      | 105 (11.3) | 3 (12.0)  | 11 (7.1)   |          |          |
| Former smoker                       | 78 (8.4)   | 0 (0.0)   | 14 (9.0)   |          |          |
| Never smoker                        | 750 (80.4) | 22 (88.0) | 130 (83.9) |          |          |
| Alcohol intake                      |            |           |            | 2.39     | 0.67     |
| Current Drinker                     | 91 (9.7)   | 4 (16.0)  | 11 (7.1)   |          |          |
| Former drinker                      | 68 (7.2)   | 2 (8.0)   | 12 (7.7)   |          |          |
| Never drinker                       | 780 (83.1) | 19 (76.0) | 132 (85.2) |          |          |

|    |                     |            |           |            |       |        |
|----|---------------------|------------|-----------|------------|-------|--------|
| 1  |                     |            |           |            |       |        |
| 2  |                     |            |           |            |       |        |
| 3  |                     |            |           |            |       |        |
| 4  | TB knowledge scores |            |           |            |       |        |
| 5  | < 3                 | 249 (27.5) | 12 (50.0) | 72 (48.3)  | 30.25 | < 0.01 |
| 6  | ≥ 3                 | 657 (72.5) | 12 (50.0) | 77 (51.7)  |       |        |
| 7  |                     |            |           |            |       |        |
| 8  | TB attitudes scores |            |           |            |       |        |
| 9  | < 3                 | 417 (47.3) | 15 (65.2) | 114 (77.6) | 47.74 | < 0.01 |
| 10 | ≥ 3                 | 464 (52.7) | 8 (34.8)  | 33 (22.4)  |       |        |
| 11 |                     |            |           |            |       |        |
| 12 | TB practice scores  |            |           |            |       |        |
| 13 | < 4                 | 433 (53.6) | 18 (85.7) | 104 (78.8) | 36.41 | < 0.01 |
| 14 |                     |            |           |            |       |        |
| 15 | ≥ 4                 | 375 (46.4) | 3 (14.3)  | 28 (21.2)  |       |        |
| 16 |                     |            |           |            |       |        |

\*Missing number of participants: age: 10; gender: 7; residence: 29; education level: 31; marital status: 59; medical insurance: 60; family annual income per capita: 69; self-perceived health status: 73; smoking status: 10; alcohol consumption habits: 4; TB knowledge scores: 44; TB attitudes scores: 72; TB practice scores: 162.

Abbreviation: TB, tuberculosis.



**Table 4 Binary logistic regression analysis for the association with medical care-seeking willingness for tuberculosis among elderly population\* (N=903)**

| Variables                                           | <i>B</i> | SE   | <i>Wald</i> $\chi^2$ | <i>P</i> | OR (95% CI)      |
|-----------------------------------------------------|----------|------|----------------------|----------|------------------|
| Family annual income per capita (¥) (ref: < 50,000) |          |      |                      |          |                  |
| 50,000~100,000                                      | 0.94     | 0.29 | 10.37                | < 0.01   | 2.56 (1.44–4.54) |
| 100,000~200,000                                     | -0.1     | 0.26 | 0.15                 | 0.69     | 0.90 (0.54–1.51) |
| > 200,000                                           | 0.29     | 0.39 | 0.57                 | 0.45     | 1.34 (0.63–2.86) |
| TB attitudes scores (ref: < 3)                      |          |      |                      |          |                  |
| ≥ 3                                                 | 1.13     | 0.25 | 20.51                | < 0.01   | 3.10 (1.90–5.05) |
| TB practice scores (ref: < 4)                       |          |      |                      |          |                  |
| ≥ 4                                                 | 1.14     | 0.28 | 16.93                | < 0.01   | 3.13 (1.82–5.39) |

\*Adjustment for age (65~70, 71~75, > 75), gender (male, female), residence (local residents, others), education (primary school or below, junior or senior middle school, college degree or above), marital status (married, unmarried/widow/divorced), medical insurance (yes, no), self-perceived health status (good, fair, bad), smoking status (current smoker, former smoker, never smoker), alcohol intake (current drinker, former drinker, never drinker), TB knowledge scores (< 3, ≥ 3), and other variables in the model.

Abbreviation: OR, odds ratio; SE, standard error; TB, tuberculosis.

## A survey of the elderly's awareness and health-related practices of tuberculosis

### Socio-demographic information section:

1. Age: \_\_\_ years old.

2. Gender:

Male

Female

3. Are you a local resident?

Yes

No

4. Your duration of residence in Shenzhen is \_\_\_ years \_\_\_ months.

5. Education level:

Illiteracy

Primary school

Junior high school

High school / Secondary school

Junior college

Undergraduate or higher

1  
2  
3  
4  
5  
6 6. Marital status:  
7

8  
9  Unmarried

10  
11  Married

12  
13  Divorced

14  
15  Widowed  
16  
17  
18  
19  
20  
21

22 7. Medical insurance:  
23

24  Basic medical insurance for urban and rural residents (including New rural cooperative  
25  
26 medical insurance)  
27

28  
29  Medical insurance for urban employee

30  
31  Commercial insurance

32  
33  Free medical services

34  
35  No medical insurance  
36  
37  
38  
39  
40  
41  
42

43 8. Family annual income per capita (RMB):  
44

45  Less than 50,000

46  
47  50,000 to 100,000

48  
49  100,000 to 200,000

50  
51  200,000 to 500,000

52  
53  More than 500,000  
54  
55  
56  
57  
58  
59  
60

**Health-related characteristic section:**

1. How do you feel your current health status?

Very good

Relatively good

Fair

Relatively bad

Very bad

2. Are you a smoker?

Yes

Former smoker

No

3. Do you drink alcohol?

Yes

Former drinker

No

4. Have you previously been treated for TB?

Yes

No

**Tuberculosis knowledge, attitudes, and practices section:****Knowledge**

## 1. Infectivity of TB

- Yes
- No
- Do not know

## 2. Route of TB transmission

- Touching items
- Sharing utensils
- Coughing or sneezing
- All of the above
- Do not know

## 3. TB symptoms

- Headache or dizziness
- Coughing for longer than 2 weeks or coughing up blood
- Abdominal pain or diarrhoea
- Do not know

## 4. Prevention and control of TB

- Covering mouth and nose when coughing or sneezing

- 1  
2  
3  
4  Wearing a mask  
5  
6  Good nutrition  
7  
8  
9  Washing hands after touching items in public  
10  
11  
12  All of the above  
13  
14  
15  
16

17 5. Curability of TB

- 18  
19  Yes  
20  
21  
22  No  
23  
24  
25  Do not know  
26  
27  
28  
29

30 **Attitudes**

31  
32 1. Do you think that TB is a terrible disease?  
33  
34

- 35  Yes  
36  
37  No  
38  
39  
40  Do not sure  
41  
42  
43  
44

45 2. Would you like to learn about TB?  
46  
47

- 48  Yes  
49  
50  
51  No  
52  
53  Do not sure  
54  
55  
56  
57

58 3. Would you like to participate in TB education activities?  
59  
60

1  
2  
3  
4  Yes

5  
6  No

7  
8  
9  Do not sure

10  
11  
12  
13  
14 4. Are you willing to complete treatment if you have TB?

15  
16  
17  Yes

18  
19  No

20  
21  
22  Do not sure

23  
24  
25  
26  
27 5. Would you be willing to be screened for TB if you had suggestive symptoms?

28  
29  Yes

30  
31  
32  No

33  
34  
35  Do not sure

36  
37  
38  
39  
40 **Practices**

41  
42  
43 1. Have you ever taken the initiative to learn about TB?

44  
45  Yes

46  
47  No

48  
49  
50  Do not sure

51  
52  
53  
54  
55 2. Would you urge your friends with suspicious TB symptoms visit the doctor?

56  
57  
58  Yes

1  
2  
3  
4  No

5  
6  Do not sure  
7  
8  
9

10  
11 3. Would you visit a health facility if you had a cough for more than 2 weeks?  
12

13  
14  Yes

15  
16  No

17  
18  Do not sure  
19  
20  
21

22  
23  
24 4. Would you visit a health facility if you suspected that you had TB?  
25

26  
27  Yes

28  
29  No

30  
31  Do not sure  
32  
33  
34

35  
36  
37 5. Would you stop spitting in public?  
38

39  
40  Yes

41  
42  No

43  
44  Do not sure  
45  
46  
47

48  
49  
50 6. Would you cover your mouth and nose when coughing or sneezing?  
51

52  
53  Yes

54  
55  No

56  
57  Do not sure  
58  
59  
60



1  
2  
3  
4  
5  
6  
7 **Medical care-seeking willingness for TB section:**  
8

9 1. Were you willing to seek medical care if you suspected that you had TB?

10  
11  Yes (end of survey)

12  
13  Neutral (end of survey)

14  
15  No  
16  
17  
18

19  
20  
21  
22 2. Why were you unwilling to seek medical care if you suspected that you had TB?

23  
24 (Multiple choice)

25  
26  Lack of trust in the medical level of TB prevention and treatment institutions

27  
28  Poor attitude of medical staff

29  
30  Long treatment time and heavy economic burden

31  
32  Fear of discrimination

33  
34  Others: \_\_  
35  
36  
37  
38  
39  
40  
41  
42  
43  
44  
45  
46  
47  
48  
49  
50  
51  
52  
53  
54  
55  
56  
57  
58  
59  
60

STROBE 2007 (v4) Statement—Checklist of items that should be included in reports of cross-sectional studies

| Section/Topic             | Item # | Recommendation                                                                                                                                                                       | Reported on page # |
|---------------------------|--------|--------------------------------------------------------------------------------------------------------------------------------------------------------------------------------------|--------------------|
| Title and abstract        | 1      | (a) Indicate the study’s design with a commonly used term in the title or the abstract                                                                                               | 1, 2               |
|                           |        | (b) Provide in the abstract an informative and balanced summary of what was done and what was found                                                                                  | 2                  |
| <b>Introduction</b>       |        |                                                                                                                                                                                      |                    |
| Background/rationale      | 2      | Explain the scientific background and rationale for the investigation being reported                                                                                                 | 4, 5               |
| Objectives                | 3      | State specific objectives, including any prespecified hypotheses                                                                                                                     | 4, 5               |
| <b>Methods</b>            |        |                                                                                                                                                                                      |                    |
| Study design              | 4      | Present key elements of study design early in the paper                                                                                                                              | 6, 7               |
| Setting                   | 5      | Describe the setting, locations, and relevant dates, including periods of recruitment, exposure, follow-up, and data collection                                                      | 5, 6, 7            |
| Participants              | 6      | (a) Give the eligibility criteria, and the sources and methods of selection of participants                                                                                          | 6                  |
| Variables                 | 7      | Clearly define all outcomes, exposures, predictors, potential confounders, and effect modifiers. Give diagnostic criteria, if applicable                                             | 6, 7, 8            |
| Data sources/ measurement | 8*     | For each variable of interest, give sources of data and details of methods of assessment (measurement). Describe comparability of assessment methods if there is more than one group | 7, 8               |
| Bias                      | 9      | Describe any efforts to address potential sources of bias                                                                                                                            | 8                  |
| Study size                | 10     | Explain how the study size was arrived at                                                                                                                                            | 6                  |
| Quantitative variables    | 11     | Explain how quantitative variables were handled in the analyses. If applicable, describe which groupings were chosen and why                                                         | 8                  |
| Statistical methods       | 12     | (a) Describe all statistical methods, including those used to control for confounding                                                                                                | 8                  |
|                           |        | (b) Describe any methods used to examine subgroups and interactions                                                                                                                  | 8                  |
|                           |        | (c) Explain how missing data were addressed                                                                                                                                          | N/A                |
|                           |        | (d) If applicable, describe analytical methods taking account of sampling strategy                                                                                                   | N/A                |
|                           |        | (e) Describe any sensitivity analyses                                                                                                                                                | N/A                |
| <b>Results</b>            |        |                                                                                                                                                                                      |                    |

|                          |     |                                                                                                                                                                                                              |            |
|--------------------------|-----|--------------------------------------------------------------------------------------------------------------------------------------------------------------------------------------------------------------|------------|
| Participants             | 13* | (a) Report numbers of individuals at each stage of study—eg numbers potentially eligible, examined for eligibility, confirmed eligible, included in the study, completing follow-up, and analysed            | 8          |
|                          |     | (b) Give reasons for non-participation at each stage                                                                                                                                                         | N/A        |
|                          |     | (c) Consider use of a flow diagram                                                                                                                                                                           | N/A        |
| Descriptive data         | 14* | (a) Give characteristics of study participants (eg demographic, clinical, social) and information on exposures and potential confounders                                                                     | 9          |
|                          |     | (b) Indicate number of participants with missing data for each variable of interest                                                                                                                          | N/A        |
| Outcome data             | 15* | Report numbers of outcome events or summary measures                                                                                                                                                         | 9, 10      |
| Main results             | 16  | (a) Give unadjusted estimates and, if applicable, confounder-adjusted estimates and their precision (eg, 95% confidence interval). Make clear which confounders were adjusted for and why they were included | 9, 10      |
|                          |     | (b) Report category boundaries when continuous variables were categorized                                                                                                                                    | 8          |
|                          |     | (c) If relevant, consider translating estimates of relative risk into absolute risk for a meaningful time period                                                                                             | N/A        |
| Other analyses           | 17  | Report other analyses done—eg analyses of subgroups and interactions, and sensitivity analyses                                                                                                               | N/A        |
| <b>Discussion</b>        |     |                                                                                                                                                                                                              |            |
| Key results              | 18  | Summarise key results with reference to study objectives                                                                                                                                                     | 12         |
| Limitations              | 19  | Discuss limitations of the study, taking into account sources of potential bias or imprecision. Discuss both direction and magnitude of any potential bias                                                   | 12         |
| Interpretation           | 20  | Give a cautious overall interpretation of results considering objectives, limitations, multiplicity of analyses, results from similar studies, and other relevant evidence                                   | 10, 11, 12 |
| Generalisability         | 21  | Discuss the generalisability (external validity) of the study results                                                                                                                                        | 12         |
| <b>Other information</b> |     |                                                                                                                                                                                                              |            |
| Funding                  | 22  | Give the source of funding and the role of the funders for the present study and, if applicable, for the original study on which the present article is based                                                | 13         |

\*Give information separately for cases and controls in case-control studies and, if applicable, for exposed and unexposed groups in cohort and cross-sectional studies.

**Note:** An Explanation and Elaboration article discusses each checklist item and gives methodological background and published examples of transparent reporting. The STROBE checklist is best used in conjunction with this article (freely available on the Web sites of PLoS Medicine at <http://www.plosmedicine.org/>, Annals of Internal Medicine at <http://www.annals.org/>, and Epidemiology at <http://www.epidem.com/>). Information on the STROBE Initiative is available at [www.strobe-statement.org](http://www.strobe-statement.org).
