# Supplementary material for: Willingness to seek medical care for tuberculosis and associated factors among the elderly population in Shenzhen: a cross-sectional study
Source: PubMed Central journal article supplement — BMJ Open. 2021 Sep 20;11(9):e051291. doi: 10.1136/bmjopen-2021-051291 (PMC8458307; doi:10.1136/bmjopen-2021-051291), 2021-09-20
Supplement: bmjopen-2021-051291supp001.pdf [file bmjopen-2021-051291supp001.pdf]

## A survey of the elderly's awareness and health-related practices of tuberculosis

### Socio-demographic information section:

1. Age: \_\_ years old.
  
2. Gender:
  - Male
  - Female
  
3. Are you a local resident?
  - Yes
  - No
  
4. Your duration of residence in Shenzhen is \_\_ years \_\_ months.
  
5. Education level:
  - Illiteracy
  - Primary school
  - Junior high school
  - High school / Secondary school
  - Junior college
  - Undergraduate or higher

## 6. Marital status:

- Unmarried
- Married
- Divorced
- Widowed

## 7. Medical insurance:

- Basic medical insurance for urban and rural residents (including New rural cooperative medical insurance)
- Medical insurance for urban employee
- Commercial insurance
- Free medical services
- No medical insurance

## 8. Family annual income per capita (RMB):

- Less than 50,000
- 50,000 to 100,000
- 100,000 to 200,000
- 200,000 to 500,000
- More than 500,000

**Health-related characteristic section:**

1. How do you feel your current health status?

- Very good
- Relatively good
- Fair
- Relatively bad
- Very bad

2. Are you a smoker?

- Yes
- Former smoker
- No

3. Do you drink alcohol?

- Yes
- Former drinker
- No

4. Have you previously been treated for TB?

- Yes
- No

**Tuberculosis knowledge, attitudes, and practices section:****Knowledge**

## 1. Infectivity of TB

- Yes
- No
- Do not know

## 2. Route of TB transmission

- Touching items
- Sharing utensils
- Coughing or sneezing
- All of the above
- Do not know

## 3. TB symptoms

- Headache or dizziness
- Coughing for longer than 2 weeks or coughing up blood
- Abdominal pain or diarrhoea
- Do not know

## 4. Prevention and control of TB

- Covering mouth and nose when coughing or sneezing

- Wearing a mask
- Good nutrition
- Washing hands after touching items in public
- All of the above

5. Curability of TB

- Yes
- No
- Do not know

**Attitudes**

1. Do you think that TB is a terrible disease?

- Yes
- No
- Do not sure

2. Would you like to learn about TB?

- Yes
- No
- Do not sure

3. Would you like to participate in TB education activities?

- Yes
- No
- Do not sure

4. Are you willing to complete treatment if you have TB?

- Yes
- No
- Do not sure

5. Would you be willing to be screened for TB if you had suggestive symptoms?

- Yes
- No
- Do not sure

### **Practices**

1. Have you ever taken the initiative to learn about TB?

- Yes
- No
- Do not sure

2. Would you urge your friends with suspicious TB symptoms visit the doctor?

- Yes

No

Do not sure

3. Would you visit a health facility if you had a cough for more than 2 weeks?

Yes

No

Do not sure

4. Would you visit a health facility if you suspected that you had TB?

Yes

No

Do not sure

5. Would you stop spitting in public?

Yes

No

Do not sure

6. Would you cover your mouth and nose when coughing or sneezing?

Yes

No

Do not sure

**Medical care-seeking willingness for TB section:**

1. Were you willing to seek medical care if you suspected that you had TB?

Yes (end of survey)

Neutral (end of survey)

No

2. Why were you unwilling to seek medical care if you suspected that you had TB?

(Multiple choice)

Lack of trust in the medical level of TB prevention and treatment institutions

Poor attitude of medical staff

Long treatment time and heavy economic burden

Fear of discrimination

Others: \_\_
